# Supplementary material for: Origins of the 2009 H1N1 influenza pandemic in swine in Mexico
Source: PubMed Central journal article supplement (PMC4957980; doi:10.7554/elife.16777), 2016-06-28
Supplement: elife-16777-supp1.pdf [file elife-16777-supp1.pdf]

**DPCC FASTA Reference for Sequence Submission v2.0**

|                   | <b>Sequence_Identifier</b>                                                                                                                                                   | <b>Sample_Identifier</b>                                                                                                                                                   | <b>Segment</b>                                                                                                                                                                                                                                                                                     | <b>Clone_Identifier</b>                                                                                                                                                                                                                             |
|-------------------|------------------------------------------------------------------------------------------------------------------------------------------------------------------------------|----------------------------------------------------------------------------------------------------------------------------------------------------------------------------|----------------------------------------------------------------------------------------------------------------------------------------------------------------------------------------------------------------------------------------------------------------------------------------------------|-----------------------------------------------------------------------------------------------------------------------------------------------------------------------------------------------------------------------------------------------------|
| <b>Input Type</b> | Text Field                                                                                                                                                                   | Text Field                                                                                                                                                                 | Text Field                                                                                                                                                                                                                                                                                         | Text Field                                                                                                                                                                                                                                          |
| <b>Definition</b> | A unique identifier for each sequence in a submission                                                                                                                        | The identifier assigned to the virus strain                                                                                                                                | The viral gene name of the sequence submission                                                                                                                                                                                                                                                     | The identifier assigned to the individual clone of the influenza virus genome segment                                                                                                                                                               |
| <b>Format</b>     | Text<br>Maximum length: 90 characters                                                                                                                                        | Text<br>Maximum length: 50 characters                                                                                                                                      | Text<br>Maximum length: 25 characters                                                                                                                                                                                                                                                              | Text<br>Maximum length: 15 characters                                                                                                                                                                                                               |
| <b>Value List</b> | None                                                                                                                                                                         | None                                                                                                                                                                       | Influenza A virus:<br>PB2, PB1, PA, HA, NP, NA, MP, or NS<br><br>Influenza B virus:<br>PB1, PB2, PA, HA, NP, NA, MP, or NS<br><br>Influenza C virus:<br>PB2, PB1, P3, HE, NP, MP, or NS<br><br>Influenza D virus:<br>PB2, PB1, P3, HE, NP, P42, or NS<br><br>Other virus types:<br>Enter gene name | None                                                                                                                                                                                                                                                |
| <b>Curation</b>   | The entry must be unique for each sequence in the FASTA file. Data elements must match those listed in the Sample_Identifier, Segment, and optional Clone_Identifier fields. | The Sample_Identifier initially assigned to the surveillance sample must be provided.                                                                                      | No spaces are allowed.<br><br>Segment must match the influenza virus type (A, B, C, or D) listed in the Strain_Name field on the Sequence Metadata template.<br><br>For other virus types, if the sequence covers multiple genes, comma-separate individual gene names.                            | No spaces are allowed.<br><br>Optional field                                                                                                                                                                                                        |
| <b>Examples</b>   | 22258468.PB2 or<br>452134.HA.1 or<br>452134.HA.2 or<br>452134.NA.Major_variant or<br>452134.NA.Minor_variant                                                                 | 22258468 or<br>452134                                                                                                                                                      | PB2 or<br>HA or<br>RdRp or<br>Capsid,RdRp                                                                                                                                                                                                                                                          | 1 or<br>2 or<br>Major_variant or<br>Minor_variant                                                                                                                                                                                                   |
| <b>Notes</b>      |                                                                                                                                                                              | Submissions without a corresponding surveillance submission will be listed as orphaned records.<br><br>For non-surveillance submissions, enter a unique Sample_Identifier. |                                                                                                                                                                                                                                                                                                    | This field is not required when submitting a single sequence for an individual genome Segment.<br><br>This field is required when submitting multiple sequences for the same Segment and Sample_Identifier i.e., from mixed or co-infected samples. |
