# Supplementary material for: Origins of the 2009 H1N1 influenza pandemic in swine in Mexico
Source: PubMed Central journal article supplement (PMC4957980; doi:10.7554/elife.16777), 2016-06-28
Supplement: elife-16777-supp2.pdf [file elife-16777-supp2.pdf]

**DPCP METADATA Reference for Sequence Submission v2.0**

Global validation rules:

1. All fields are required and cannot be blank
2. The capital letter U for "Unknown" can be used in place of blank
3. The abbreviation NA is used for "Not Available" or "Not Applicable"
4. The OTH abbreviation is always used for "Other"
5. Use comma (,) to separate multiple values in the same field
6. Use double quotes (") to escape entries with commas when not intended to separate multiple values (e.g., "Jones, Indiana")
7. Controlled values are case-sensitive and must be entered in all-caps

| Input Type | Project_Identifier                                                                                                                         | Contributing_Institution                                                                                                                           | Sample_Identifier                                                                                                                                                      | BioProject_Accession_Number                                                                            | Embargo_End_Date                                                                                                                                                                                                          | Provisional_Authors                                                                                                                                                                                                                      | Submission_Title                                                                                                                                                                                                                                                         |
|------------|--------------------------------------------------------------------------------------------------------------------------------------------|----------------------------------------------------------------------------------------------------------------------------------------------------|------------------------------------------------------------------------------------------------------------------------------------------------------------------------|--------------------------------------------------------------------------------------------------------|---------------------------------------------------------------------------------------------------------------------------------------------------------------------------------------------------------------------------|------------------------------------------------------------------------------------------------------------------------------------------------------------------------------------------------------------------------------------------|--------------------------------------------------------------------------------------------------------------------------------------------------------------------------------------------------------------------------------------------------------------------------|
| Definition | Text Field<br>A unique Project Identifier generated by the DPCP by combining the Center-generated Project Code and a random 4-digit number | Text Field<br>The institution code for the group that PERFORMED THE ANALYSIS. Must be one of the CEIRS institution codes assigned by NAID          | Text Field<br>Identifier initially assigned to each sample collected. If multiple samples are taken from the same host, each sample should have its own identifier.    | Text Field<br>The BioProject unique accession number associated with the sequence submission           | Date Field<br>In case an embargo of the information is needed, the date that the information should be released to the public databases by the DPCP                                                                       | Text Field<br>The list of authors associated with the sequence submission. Default entry in absence of a Publication_PMID will be the authors listed by the user. If a Publication_PMID is provided, Publication authors will be listed. | Text Field<br>The descriptive title assigned to the sequence submission. Default entry in absence of a Publication_PMID will be "Direct Submission (CEIRS DPCP)". If a Publication_PMID is provided, Submission_Title should be the title of the referenced publication. |
| Format     | Project_Code_XXXX<br>Maximum length: 21 characters                                                                                         | Center three-letter code followed by three digits.<br>Maximum length: 6 characters                                                                 | Center-specific<br>Maximum length: 50 characters                                                                                                                       | BioProject ID<br>Maximum length: 15 characters                                                         | DD-Mon-YYYY<br>DD-Mon-YY<br>NA<br>Maximum length: 11 characters                                                                                                                                                           | FirstName LastName<br>FirstName MI, LastName<br>Maximum length: 50 characters                                                                                                                                                            | Text<br>Maximum length: 100 characters                                                                                                                                                                                                                                   |
| Value List | None                                                                                                                                       | None                                                                                                                                               | None                                                                                                                                                                   | None                                                                                                   | Date<br>NA                                                                                                                                                                                                                | Text<br>NA                                                                                                                                                                                                                               | Text<br>NA                                                                                                                                                                                                                                                               |
| Curation   | The entry must be a Project Identifier value registered with the DPCP.                                                                     | The entry must be an Institution Code value registered with the DPCP.<br>Center 3-letter codes are case-sensitive and must be entered in all-caps. | The Sample_Identifier initially assigned to the surveillance sample must be provided.                                                                                  | The entry must be a valid BioProject accession number previously registered with the DPCP.             | 1. Leading 0 in DD is optional.<br>2. Month must match the first three letters of the month. Month is NOT case-sensitive.<br>3. Years may have two or four digits.<br>4. Date must conform to NAID data release policies. | If a Publication_PMID is entered, use NA. The list of authors from the publication will be used.                                                                                                                                         | If no Publication_PMID is provided, use NA.<br>If a Publication_PMID is entered, use the title of the publication exactly.                                                                                                                                               |
| Examples   | SJCPrq02_4001                                                                                                                              | SJC101                                                                                                                                             | 22258468                                                                                                                                                               | PRJNA37813                                                                                             | 3-Mar-2011 or 03-Mar-2011 or 03-MAR-2011 or 3-MAR-11 or NA                                                                                                                                                                | Indiana Jones, John M. Henry or NA                                                                                                                                                                                                       | Analysis of pandemic influenza H1N1 sequences from New York in 2010 or NA                                                                                                                                                                                                |
| Notes      |                                                                                                                                            |                                                                                                                                                    | Submissions without a corresponding surveillance submission will be listed as orphaned records.<br>For non-surveillance submissions, enter a unique Sample_Identifier. | The sequence must be linked to a BioProject.<br>If no relevant BioProject exists, one must be created. | An exact date must be provided.<br>If Embargo_End_Date is NA, information will be released without delay.<br>Embargo_End_Date cannot be more than 12 months after submission.                                             | The DPCP will update the GenBank entry records if and when the authors provide a publication reference after submission.<br>For listing of multiple names, comma-separate the names, maintaining the order of FirstName and LastName.    | The DPCP will update the GenBank entry records if and when the authors provide a publication reference after submission.                                                                                                                                                 |

| Input Type | Publication PMID                                                                                                                                                                                               | Molecule Type                                                                                                                                     | Sequencing Technology                                                                                                                                               | Forward Primer                                                                                                                 | Reverse Primer                                                                                                                 | Assembly Method                                                                                                                                                                                                      | Assembler Version                                                                                                          | Coverage                                                                                  |
|------------|----------------------------------------------------------------------------------------------------------------------------------------------------------------------------------------------------------------|---------------------------------------------------------------------------------------------------------------------------------------------------|---------------------------------------------------------------------------------------------------------------------------------------------------------------------|--------------------------------------------------------------------------------------------------------------------------------|--------------------------------------------------------------------------------------------------------------------------------|----------------------------------------------------------------------------------------------------------------------------------------------------------------------------------------------------------------------|----------------------------------------------------------------------------------------------------------------------------|-------------------------------------------------------------------------------------------|
| Definition | Text Field<br>The PubMed Unique Identifier (PMID) for the publication in which the sequence was published                                                                                                      | Text Field<br>The type of organic molecule that was sequenced                                                                                     | Text Field<br>The name of the sequencing technology used to obtain the submitted sequences                                                                          | Text Field<br>The forward PCR primer that was used to amplify the nucleic acid that was sequenced                              | Text Field<br>The reverse PCR primer that was used to amplify the nucleic acid that was sequenced                              | Text Field<br>The name of the program used to assemble next-generation sequence reads                                                                                                                                | Text Field<br>The version of the assembly program used or, if not available, the date the assemblies were made             | Text Field<br>The average number of reads representing a given nucleotide in the sequence |
| Format     | PMID<br>Maximum length: 50 characters                                                                                                                                                                          | Text<br>Maximum length: 15 characters                                                                                                             | Text<br>Maximum length: 150 characters                                                                                                                              | Name:Sequence<br>Maximum length: 50 characters                                                                                 | Name:Sequence<br>Maximum length: 50 characters                                                                                 | Text<br>Maximum length: 150 characters                                                                                                                                                                               | Text<br>DD-MON-YYYY<br>DD-MON-YY<br>D-MON-YY<br>Maximum length: 50 characters                                              | Text<br>Maximum length: 50 characters                                                     |
| Value List | Text<br>NA                                                                                                                                                                                                     | genomic DNA<br>genomic RNA<br>mRNA<br>other RNA<br>other DNA<br>rRNA<br>transcribed RNA<br>iRNA<br>unassigned DNA<br>unassigned RNA<br>viral cRNA | 454<br>Helicos<br>Illumina<br>IonTorrent<br>Pacific Biosciences<br>Sanger<br>SOLID<br>OTI-                                                                          | Text<br>U                                                                                                                      | Text<br>U                                                                                                                      | None                                                                                                                                                                                                                 | None                                                                                                                       | Number<br>U                                                                               |
| Curation   | The entry must be a valid PMID number: 7 or 8-digit number with no leading zeros.<br><a href="http://www.nlm.nih.gov/pubmed/medlineelements.html#id">http://www.nlm.nih.gov/pubmed/medlineelements.html#id</a> | The entry must be one and only one member of the Value List.                                                                                      | The entry must be one or multiple comma separated members of the Value List.<br><br>If OTI- is selected, then sequencing technology should be entered as free text. | The entry must include the forward primer name and nucleotide sequence separated by a colon.                                   | The entry must include the reverse primer name and nucleotide sequence separated by a colon.                                   | The entry must be the name of a valid sequence assembly program.                                                                                                                                                     | The entry must be the version number of the assembly program used in format v.x.x or the date the assemblies were created. | The entry must be a number or enter U if unknown.                                         |
| Examples   | 25463985                                                                                                                                                                                                       | viral cRNA                                                                                                                                        | IonTorrent                                                                                                                                                          | fwf_seq_catgttgacaaaggaaa or U                                                                                                 | rev_seq_atgttgatgacatgggga or U                                                                                                | IonTorrent Assembler                                                                                                                                                                                                 | v.3.2 or 03-Mar-2011 or 3-Mar-2011 or 3-Mar-11                                                                             | 25.47                                                                                     |
| Notes      | If the sequence was referenced in multiple publications, comma-separate the individual PMIDs.<br>Enter NA if the sequence was not referenced in a publication.                                                 | Enter viral cRNA for influenza virus sequences.<br>Enter genomic DNA for plasmid sequences or sequences of ribosomal RNA genes.                   | If more than one sequencing technology is used, comma-separate individual technologies.                                                                             | If multiple forward primers were used, comma-separate individual forward primers.<br>Enter U if the forward primer is unknown. | If multiple reverse primers were used, comma-separate individual reverse primers.<br>Enter U if the reverse primer is unknown. | Sequences must be pre-assembled. Raw sequence reads from next generation sequencing technologies should not be submitted to GenBank.<br>If more than one assembly method is used, comma-separate individual methods. | If more than one assembly method is used, comma-separate individual versions.                                              | If more than one coverage is used, comma-separate individual coverages.                   |

| Input Type        | Genbank_Accession_Numbers                                                                          | Strain_Name                                                                                                                                                                                                                                                                                                                                                                                                                                                                                                                                                                                                                                                                                                                            | Sample_Material                                                                                                                                                                                                                                                                                                                                                                                                                                                                                                                                                                                               | Surveillance_Sample                                                                        | Host_Species                                                                                                                                                                                                                                                                                                                                                                                                                                                                                                                          | Host_Common_Name                                                                                                                                                     | Collection_Date                                                                                                                                                                                                | Collection_Country                                                                                                                                                        |
|-------------------|----------------------------------------------------------------------------------------------------|----------------------------------------------------------------------------------------------------------------------------------------------------------------------------------------------------------------------------------------------------------------------------------------------------------------------------------------------------------------------------------------------------------------------------------------------------------------------------------------------------------------------------------------------------------------------------------------------------------------------------------------------------------------------------------------------------------------------------------------|---------------------------------------------------------------------------------------------------------------------------------------------------------------------------------------------------------------------------------------------------------------------------------------------------------------------------------------------------------------------------------------------------------------------------------------------------------------------------------------------------------------------------------------------------------------------------------------------------------------|--------------------------------------------------------------------------------------------|---------------------------------------------------------------------------------------------------------------------------------------------------------------------------------------------------------------------------------------------------------------------------------------------------------------------------------------------------------------------------------------------------------------------------------------------------------------------------------------------------------------------------------------|----------------------------------------------------------------------------------------------------------------------------------------------------------------------|----------------------------------------------------------------------------------------------------------------------------------------------------------------------------------------------------------------|---------------------------------------------------------------------------------------------------------------------------------------------------------------------------|
| Text Field        | Text Field                                                                                         | Text Field                                                                                                                                                                                                                                                                                                                                                                                                                                                                                                                                                                                                                                                                                                                             | Text Field                                                                                                                                                                                                                                                                                                                                                                                                                                                                                                                                                                                                    | Text Field                                                                                 | Text Field                                                                                                                                                                                                                                                                                                                                                                                                                                                                                                                            | Text Field                                                                                                                                                           | Date Field                                                                                                                                                                                                     | Text Field                                                                                                                                                                |
| <b>Definition</b> | The GenBank accession number(s) for the sequence submission, if a GenBank number has been assigned | Name of the virus strain                                                                                                                                                                                                                                                                                                                                                                                                                                                                                                                                                                                                                                                                                                               | Material on which the testing was performed. If multiple samples are taken from the same host, they must be entered as separate records.                                                                                                                                                                                                                                                                                                                                                                                                                                                                      | Is the sequence derived from a surveillance sample?                                        | Full scientific name of host genus and species, without abbreviations                                                                                                                                                                                                                                                                                                                                                                                                                                                                 | The English common name given to a particular species                                                                                                                | Date on which the sample was collected.                                                                                                                                                                        | Country in which the original sample was collected                                                                                                                        |
| <b>Format</b>     | Text<br>Maximum length: 150 characters                                                             | Antigenic_Type/Host of Origin/Geographical Origin/Strain Number/Year of Isolation (Subtype)<br><br>rg-Antigenic_Type/Host of Origin/Geographical Origin/Strain Number/Year of Isolation (rg details) (Subtype)<br><br>Maximum length: 100 characters                                                                                                                                                                                                                                                                                                                                                                                                                                                                                   | Text<br>Maximum length: 30 characters                                                                                                                                                                                                                                                                                                                                                                                                                                                                                                                                                                         | Text<br>Maximum length: 1 character                                                        | Text<br>Maximum length: 50 characters                                                                                                                                                                                                                                                                                                                                                                                                                                                                                                 | Text<br>Maximum length: 50 characters                                                                                                                                | DD-Mon-YYYY<br>DD-Mon-YY<br>Mon-YYYY<br>Mon-YY<br>YYYY<br>YY<br>Maximum length: 11 characters                                                                                                                  | Text<br>Maximum length: 60 characters                                                                                                                                     |
| <b>Value List</b> | Text<br>NA<br>U                                                                                    | Text<br>U                                                                                                                                                                                                                                                                                                                                                                                                                                                                                                                                                                                                                                                                                                                              | ARR<br>BAL<br>BLO<br>CCF<br>CCO<br>CLO<br>FEC<br>LFL<br>LUN<br>NAL<br>NAS<br>NTS<br>ORP<br>OTH-<br>OTT<br>PLS<br>RCS<br>SER<br>SLU<br>SOI<br>SPU<br>TFB<br>TFT<br>TRS<br>WAT<br>U                                                                                                                                                                                                                                                                                                                                                                                                                             | Y<br>N                                                                                     | DPCC Species Dictionary<br>ENV<br>U                                                                                                                                                                                                                                                                                                                                                                                                                                                                                                   | DPCC Species Dictionary<br>U                                                                                                                                         | Date<br>U                                                                                                                                                                                                      | ISO 3166 standard of country names                                                                                                                                        |
| <b>Curator</b>    | The entry must be a valid GenBank accession number or NA if none is available.                     | WHO strain naming convention. For non-reverse genetic viruses, fields must be ordered as follows and separated with the "/" character:<br>1. The antigenic type (e.g., A, B, C)<br>2. The host of origin (e.g., swine, equine, chicken). For human-origin viruses, no host of origin designation is given.)<br>3. Geographical origin (e.g., Denver, Taiwan)<br>4. Strain number (e.g., 15, 7)<br>5. Year of isolation (e.g., 2009, 1934)<br>6. For influenza A viruses, the hemagglutinin and neuraminidase antigen description in parentheses (e.g., (H1N1), (H2N2))<br><br>If the strain is a reverse genetic virus, prefix Strain_Name with rg-. Provide reverse genetic details in brackets between year of isolation and subtype | The entry must be one and only one member of the Value List.<br>Values are case-sensitive and must be entered in all-caps.                                                                                                                                                                                                                                                                                                                                                                                                                                                                                    | The entry must be one and only one member of the value list.                               | If the entry is not ENV or U, the host species name is validated against the DPCC Species Dictionary.                                                                                                                                                                                                                                                                                                                                                                                                                                 | The entry must be a text string or U.<br>If the entry is not U, the host common name is validated against the DPCC Species Dictionary.                               | 1. Leading 0 in DD is optional.<br>2. Month must match the first three letters of the month. Month is NOT case-sensitive.<br>3. Years may have two or four digits.<br>4. Use U (Unknown) if date is not known. | The entry must be one and only one member of the Value List.<br><br>The DPCC will accept either the country name or (preferably) its unique ISO ALPHA-3 code in all-caps. |
| <b>Examples</b>   | U12345 or AF123456 or NA                                                                           | A/Hong Kong/1/1968 (H3N2),<br>A/swine/Iowa/233-56/2011 (H2N2v),<br>A/duck/Alberta/71/976 (H1N1)<br>B/Hong Kong/4/3/2014,<br>C/Texas/19876/2011,<br>Jg-A/Egypt/03/07/2010 (PR8 internal R H-2) (H5N1),<br>Jg-A/Puerto Rico/8/1934 (H1N1)                                                                                                                                                                                                                                                                                                                                                                                                                                                                                                | BLO                                                                                                                                                                                                                                                                                                                                                                                                                                                                                                                                                                                                           | Y                                                                                          | Sus scrofa or Anser albifrons                                                                                                                                                                                                                                                                                                                                                                                                                                                                                                         | Wild boar or White-fronted goose                                                                                                                                     | 3-Mar-2011 or 03-Mar-2011 or 03-MAR-2011 or Mar-2011 3-Mar-11 or 2011 or 11 or U                                                                                                                               | Viet Nam or VNM                                                                                                                                                           |
| <b>Notes</b>      | If a GenBank_Accession_Number is provided, a FASTA file is not required.                           | Reference:<br><a href="http://www.cdc.gov/flu/about/viruses/types.htm">http://www.cdc.gov/flu/about/viruses/types.htm</a><br><br>(hNx) can be used in cases where a partial subtype has been determined by viral isolation (e.g., H5Nx).<br><br>If there are mixed subtypes contained within a sample use:<br>A/chicken/Fujian/4/2002 (mixed) for Strain_Name or list multiple comma-separated Strain_Names:<br>A/mallard/Alaska/2/2007 (H5N8),<br>A/mallard/Alaska/2/2007 (H5N9).<br><br>For other virus types, enter the common Strain_Name.                                                                                                                                                                                         | ARR = Air<br>BAL = Bronchoalveolar lavage<br>BLO = Blood<br>CCF = Combined cloacal and fecal<br>CCO = Combined cloacal and oral-pharyngeal<br>CLO = Cloacal<br>FEC = Feces<br>LFL = Lung lavage fluid<br>LUN = Lunge<br>NAL = Nasal lavage<br>NAS = Nasal swab<br>NTS = Combined nasal throat swab<br>ORP = Oral-pharyngeal<br>OTH = Other; append free text to describe<br>OTT = Other tissue<br>PLS = Plasma<br>RCS = Rectal swab<br>SER = Serum<br>SLU = Slurry<br>SOI = Soil<br>SPU = Sputum<br>TFB = Tissue from brain<br>TFT = Tissue from trachea<br>TRS = Tracheal swab<br>WAT = Water<br>U = Unknown | Y = Yes<br>N = No<br><br>Enter N if the sequence is a lab strain or reverse genetic virus. | Please reference the DPCC Species Dictionary for allowed values.<br><br>Use ENV (environment) for samples taken from the environment (e.g., a water sample or feces picked up from the beach) when the source species is not known.<br><br>If genus is known but species is unknown, then use the genus followed by "sp" (for example domestic duck would be reported as "Anas sp").<br><br>If both the genus and species are unknown, then use the scientific family name, without abbreviation.<br><br>Enter U for all other cases. | Please reference the DPCC Species Dictionary for allowed values.<br><br>Use U if host common name is unknown or if the value entered under Host_Species is ENV or U. |                                                                                                                                                                                                                | The ISO 3166 standard of country names may be found on the DPCC Portal.                                                                                                   |

|            | Lab_Host                                                 | Parent_Strain_Name                                                                                                                                                                                                                                                                                                                                                                                                                                                                                                                                                                                                   | Passage_History                                                                                                                                                                                                                                                                                                                                         | Antigenic_Characterization                       | Treatment                                  | Transmission_Method                                           | Severity                                 | Phenotype                             | Comments                                                            |
|------------|----------------------------------------------------------|----------------------------------------------------------------------------------------------------------------------------------------------------------------------------------------------------------------------------------------------------------------------------------------------------------------------------------------------------------------------------------------------------------------------------------------------------------------------------------------------------------------------------------------------------------------------------------------------------------------------|---------------------------------------------------------------------------------------------------------------------------------------------------------------------------------------------------------------------------------------------------------------------------------------------------------------------------------------------------------|--------------------------------------------------|--------------------------------------------|---------------------------------------------------------------|------------------------------------------|---------------------------------------|---------------------------------------------------------------------|
| Input Type | Text Field                                               | Text Field                                                                                                                                                                                                                                                                                                                                                                                                                                                                                                                                                                                                           | Text Field                                                                                                                                                                                                                                                                                                                                              | Text Field                                       | Text Field                                 | Text Field                                                    | Text Field                               | Text Field                            | Text Field                                                          |
| Definition | Description of the lab host used for passaging the virus | Name of the parental virus strain.                                                                                                                                                                                                                                                                                                                                                                                                                                                                                                                                                                                   | Description of the passage history of the virus                                                                                                                                                                                                                                                                                                         | Any information about antigenic characterization | Description of any experimental treatments | Description of the experimental method for virus transmission | Description of the severity of infection | Description of the viral phenotype    | Text describing anything else of interest related to the submission |
| Format     | Text<br>Maximum length: 50 characters                    | Antigenic_Type/Host of Origin/Geographical Origin/Strain Number/Year of Isolation (Subtype)<br>Maximum length: 800 characters                                                                                                                                                                                                                                                                                                                                                                                                                                                                                        | Text<br>Maximum length: 50 characters                                                                                                                                                                                                                                                                                                                   | Text<br>Maximum length: 50 characters            | Text<br>Maximum length: 50 characters      | Text<br>Maximum length: 50 characters                         | Text<br>Maximum length: 50 characters    | Text<br>Maximum length: 50 characters | Text<br>Maximum length: 200 characters                              |
| Value List | None                                                     | Text<br>U                                                                                                                                                                                                                                                                                                                                                                                                                                                                                                                                                                                                            | None                                                                                                                                                                                                                                                                                                                                                    | None                                             | None                                       | None                                                          | None                                     | None                                  | Text<br>NA                                                          |
| Curation   | None                                                     | WHO strain naming convention. Fields must be ordered as follows and separated with the "/" character:<br>1. The antigenic type (e.g., A, B, C, D)<br>2. The host of origin (e.g., swine, equine, chicken. For human-origin viruses, no host of origin designation is given.)<br>3. Geographical origin (e.g., Denver, Taiwan)<br>4. Strain number (e.g., 15, 7)<br>5. Year of isolation (e.g., 2009, 1934)<br>6. For influenza A viruses, the hemagglutinin and neuraminidase antigen description in parentheses (e.g., (H1N1), (H3N2))<br><br>If the strain is a reverse genetic virus, prefix Strain_Name with rg- | None                                                                                                                                                                                                                                                                                                                                                    | None                                             | None                                       | None                                                          | None                                     | None                                  | None                                                                |
| Examples   | Embryonated chicken egg                                  | A/chicken/Fujian/4/2002 (H3N6),<br>A/chicken/Fujian/4/2002 (H4Nx),<br>A/swine/Iowa/233-56/2011 (H3N2v),<br>A/chicken/Fujian/4/2002 (mixed),<br>B/Hong Kong/432/2014, or<br>C/Texas/19876/2011                                                                                                                                                                                                                                                                                                                                                                                                                        | E2                                                                                                                                                                                                                                                                                                                                                      | NA                                               | NA                                         | Aerosol contact                                               | NA                                       | LP41                                  | NA                                                                  |
| Notes      |                                                          | Reference:<br><a href="http://www.cdc.gov/about/viruses/types.htm">http://www.cdc.gov/about/viruses/types.htm</a><br><br>(h4Nx) can be used in cases where a partial subtype has been determined by viral isolation (e.g., H5Nx).<br><br>If there are mixed subtypes contained within a sample use:<br>A/chicken/Fujian/4/2002 (mixed) for Strain_Name or list multiple comma-separated Strain_Names:<br>A/mallard/Alaska/2/2007 (H3N8),<br>A/mallard/Alaska/2/2007 (H3N9).<br><br>For other virus types, enter the common Strain_Name.                                                                              | Indicate lab host and number of passages:<br>E = Embryonated chicken eggs<br>C = MDCK cells<br>S = MDCK S1AT cells<br>M = Monkey Kidney Cells<br><br>For other hosts, write out common name and include passage number e.g., Mouse2, E(buck)1, 293T1.<br><br>Use X if the host or passage number is unknown.<br><br>Enter NA if virus was not passaged. |                                                  |                                            |                                                               |                                          |                                       | if there are no comments, enter NA.                                 |
