# Supplementary material for: Origins of the 2009 H1N1 influenza pandemic in swine in Mexico
Source: eLife journal article supplement (doi:10.7554/elife.16777), 2016-06-27
Supplement: supp [file elife-16777-supp-v1.zip]

# PB2 (pdmH1N1)

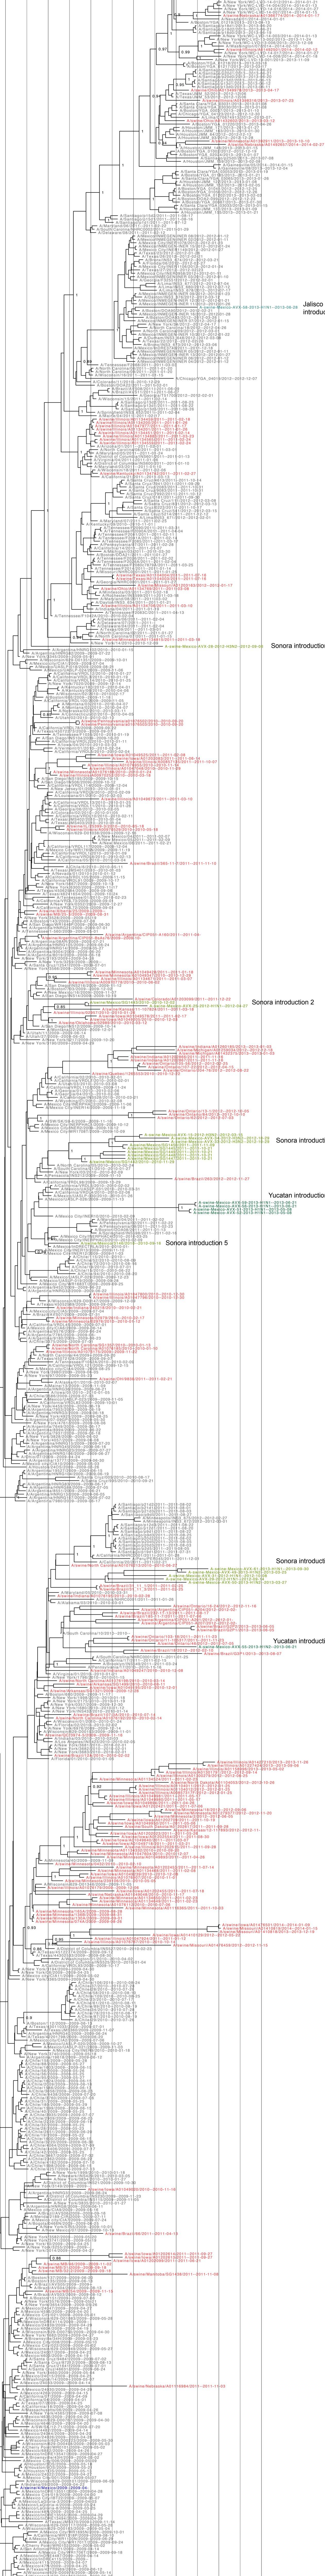

Jalisco introduction

Sonora introduction 1

Sonora introduction 2

Sonora introduction 3

Yucatan introduction 1

Sonora introduction 5

Sonora introduction 4

Yucatan introduction 2

2009 2010 2011 2012 2013 2014 2015
