# Supplementary material for: Origins of the 2009 H1N1 influenza pandemic in swine in Mexico
Source: eLife journal article supplement (doi:10.7554/elife.16777), 2016-06-27

PB2 (trig)

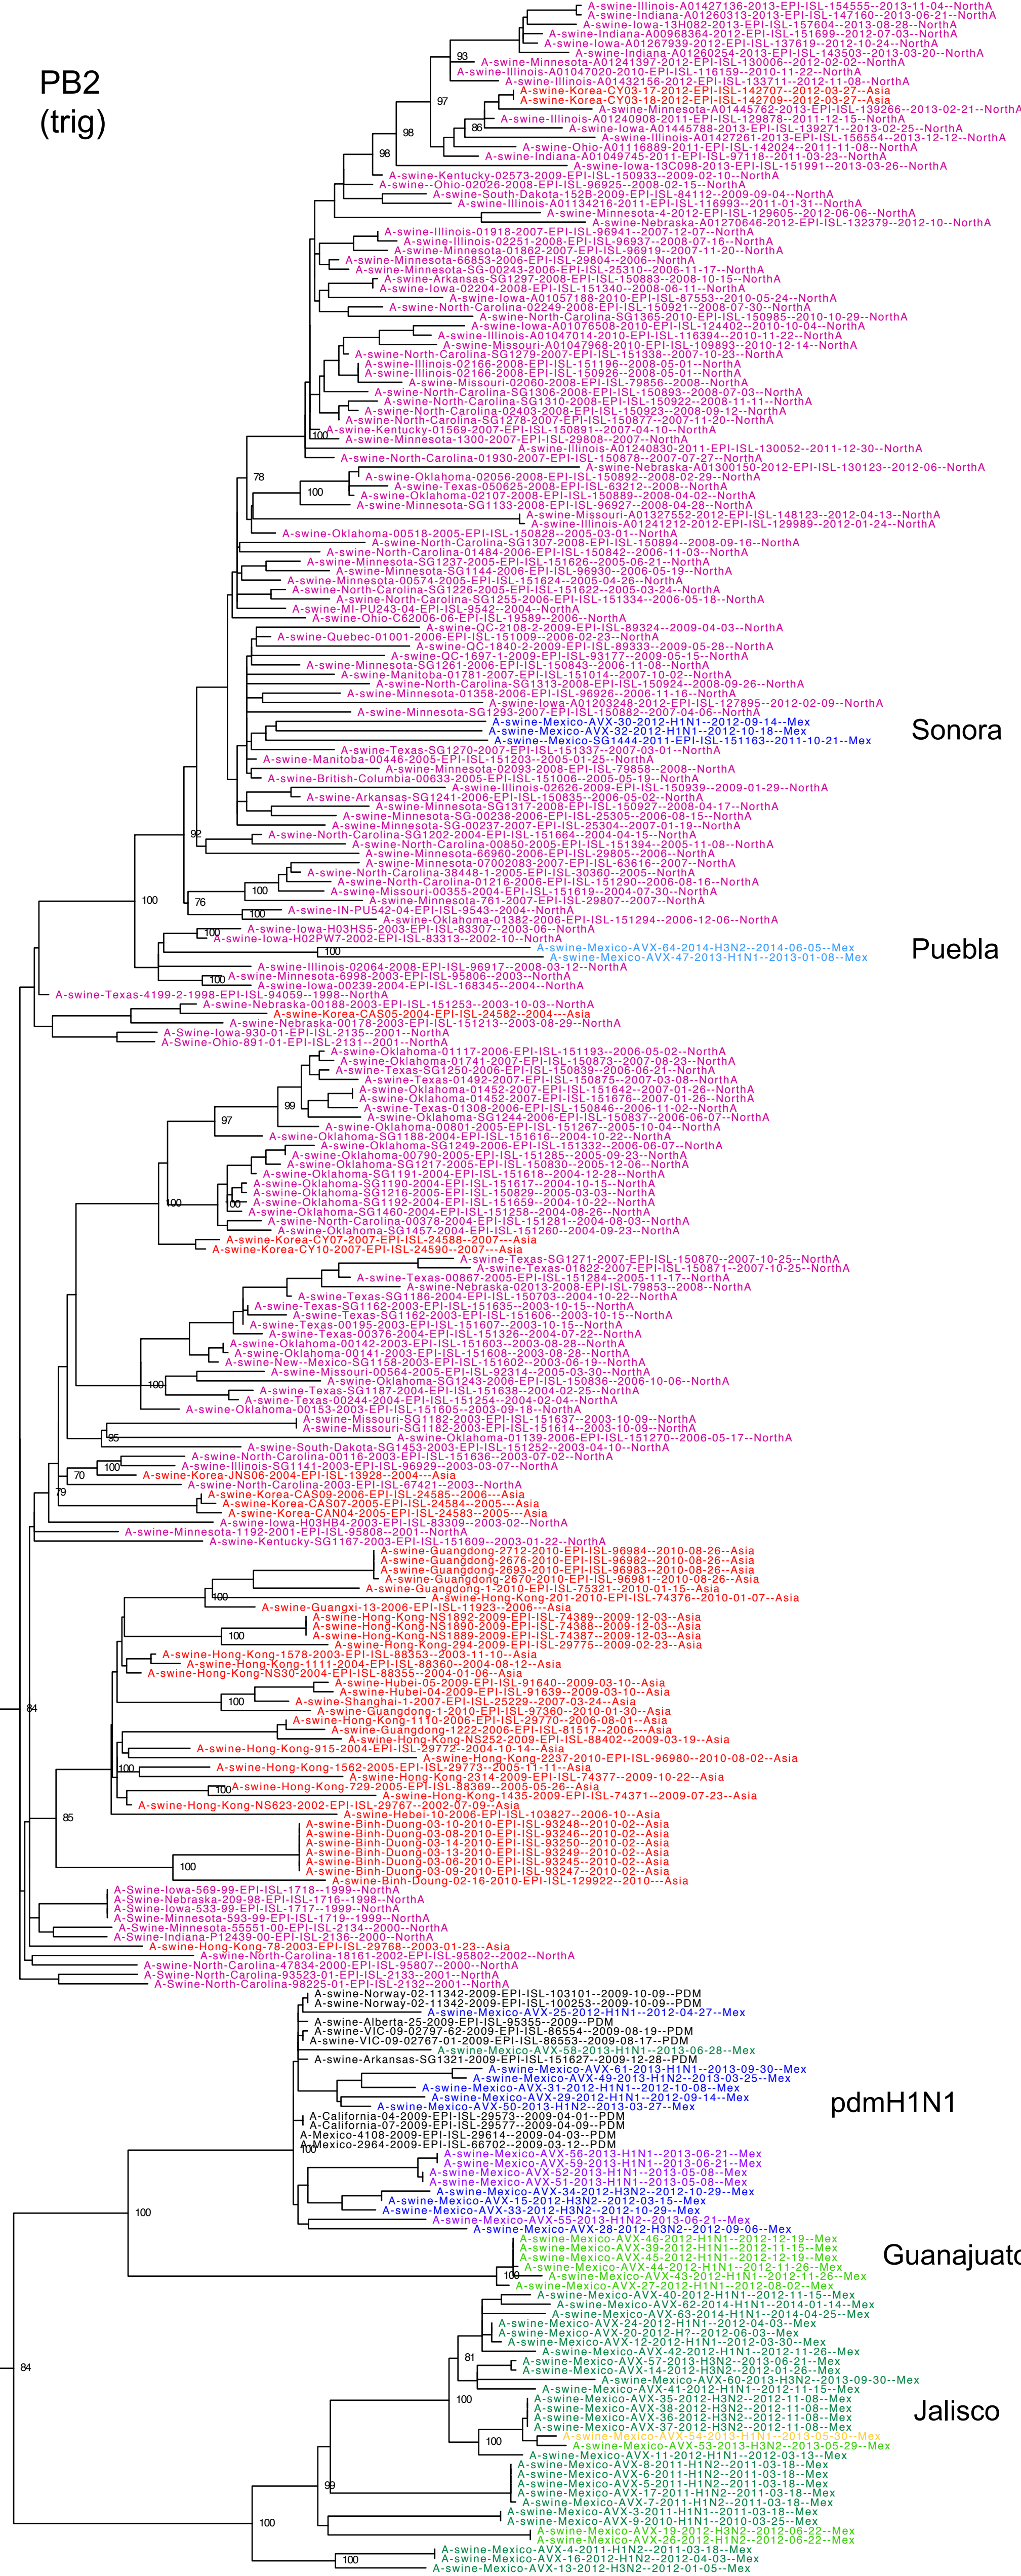

Sonora

Puebla

pdmH1N1

Guanajuato

Jalisco

0.0060



PB1 (trig)

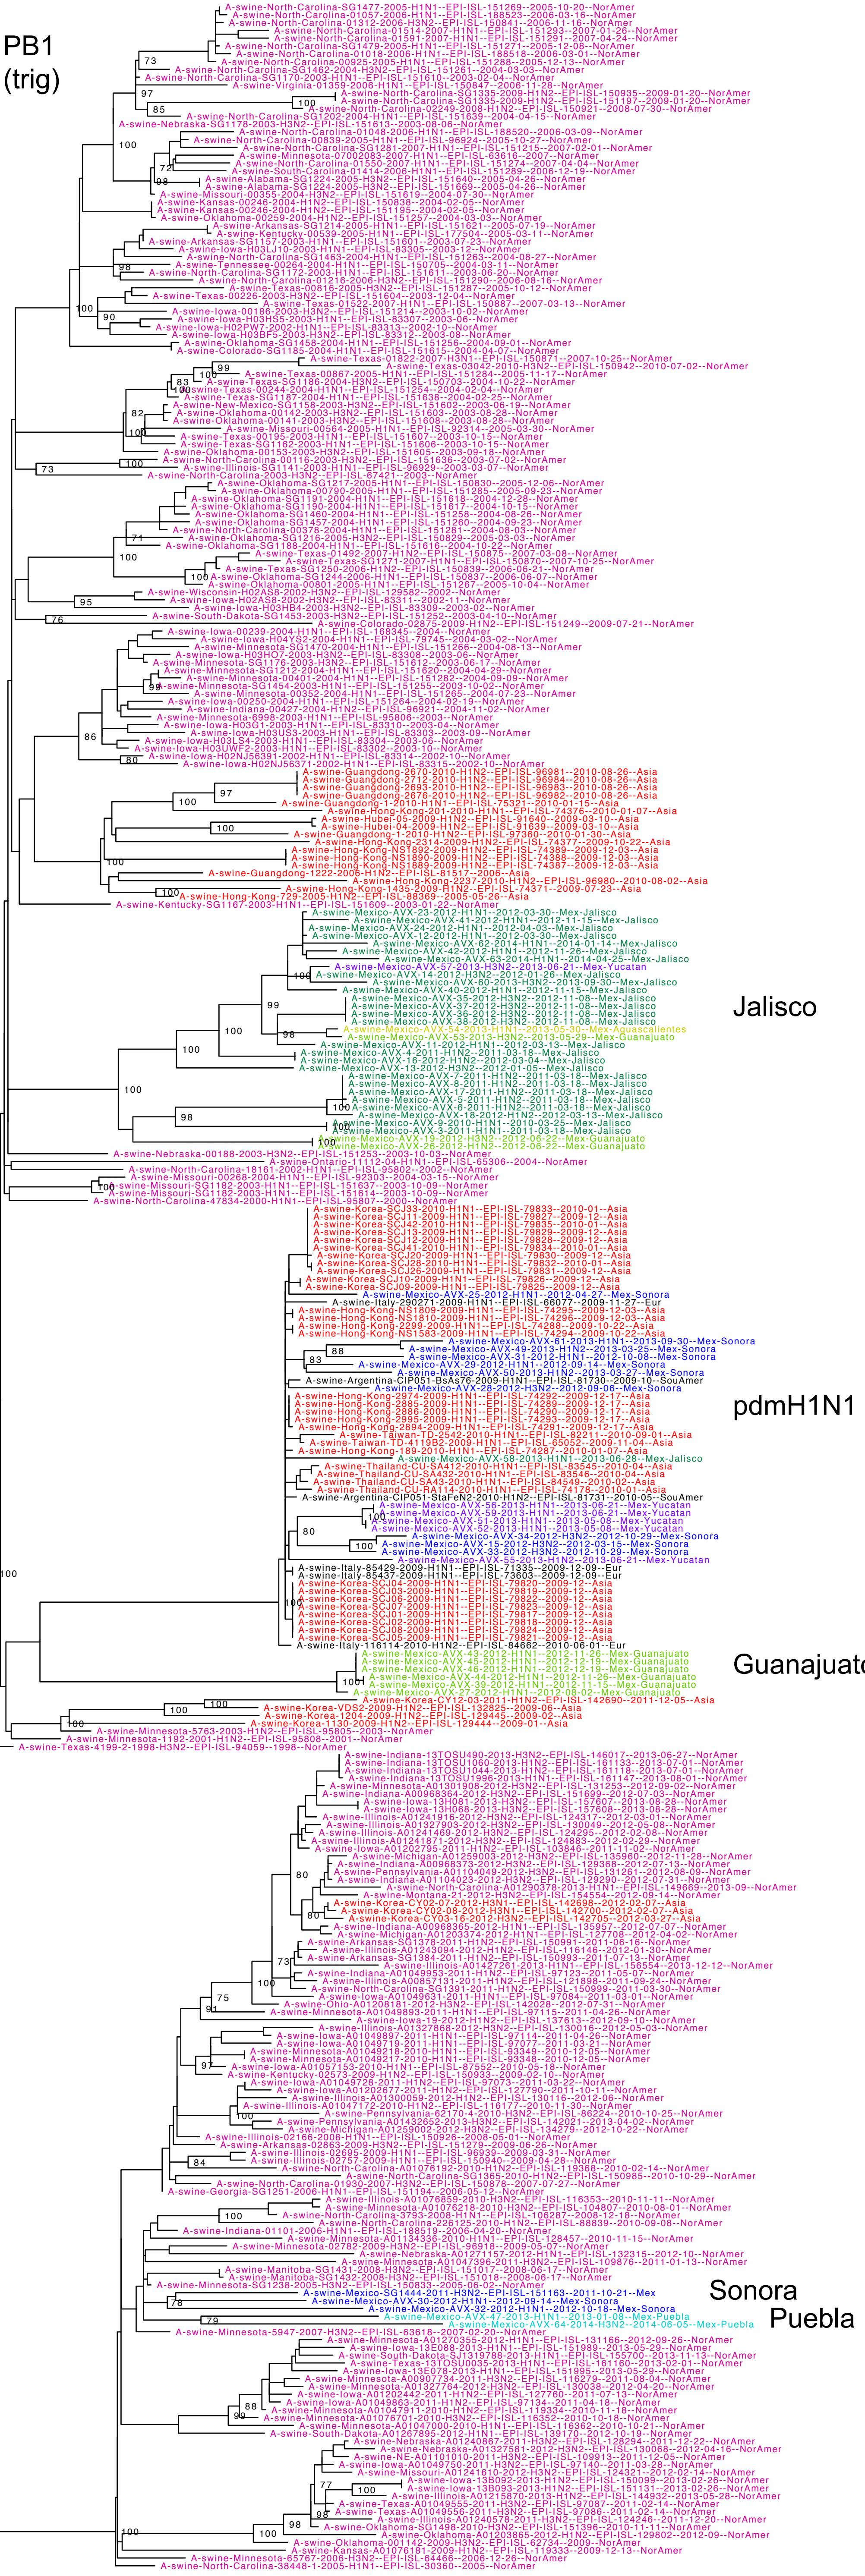

Jalisco

pdmH1N1

Guanajuato

Sonora

Puebla



PA  
(trig)

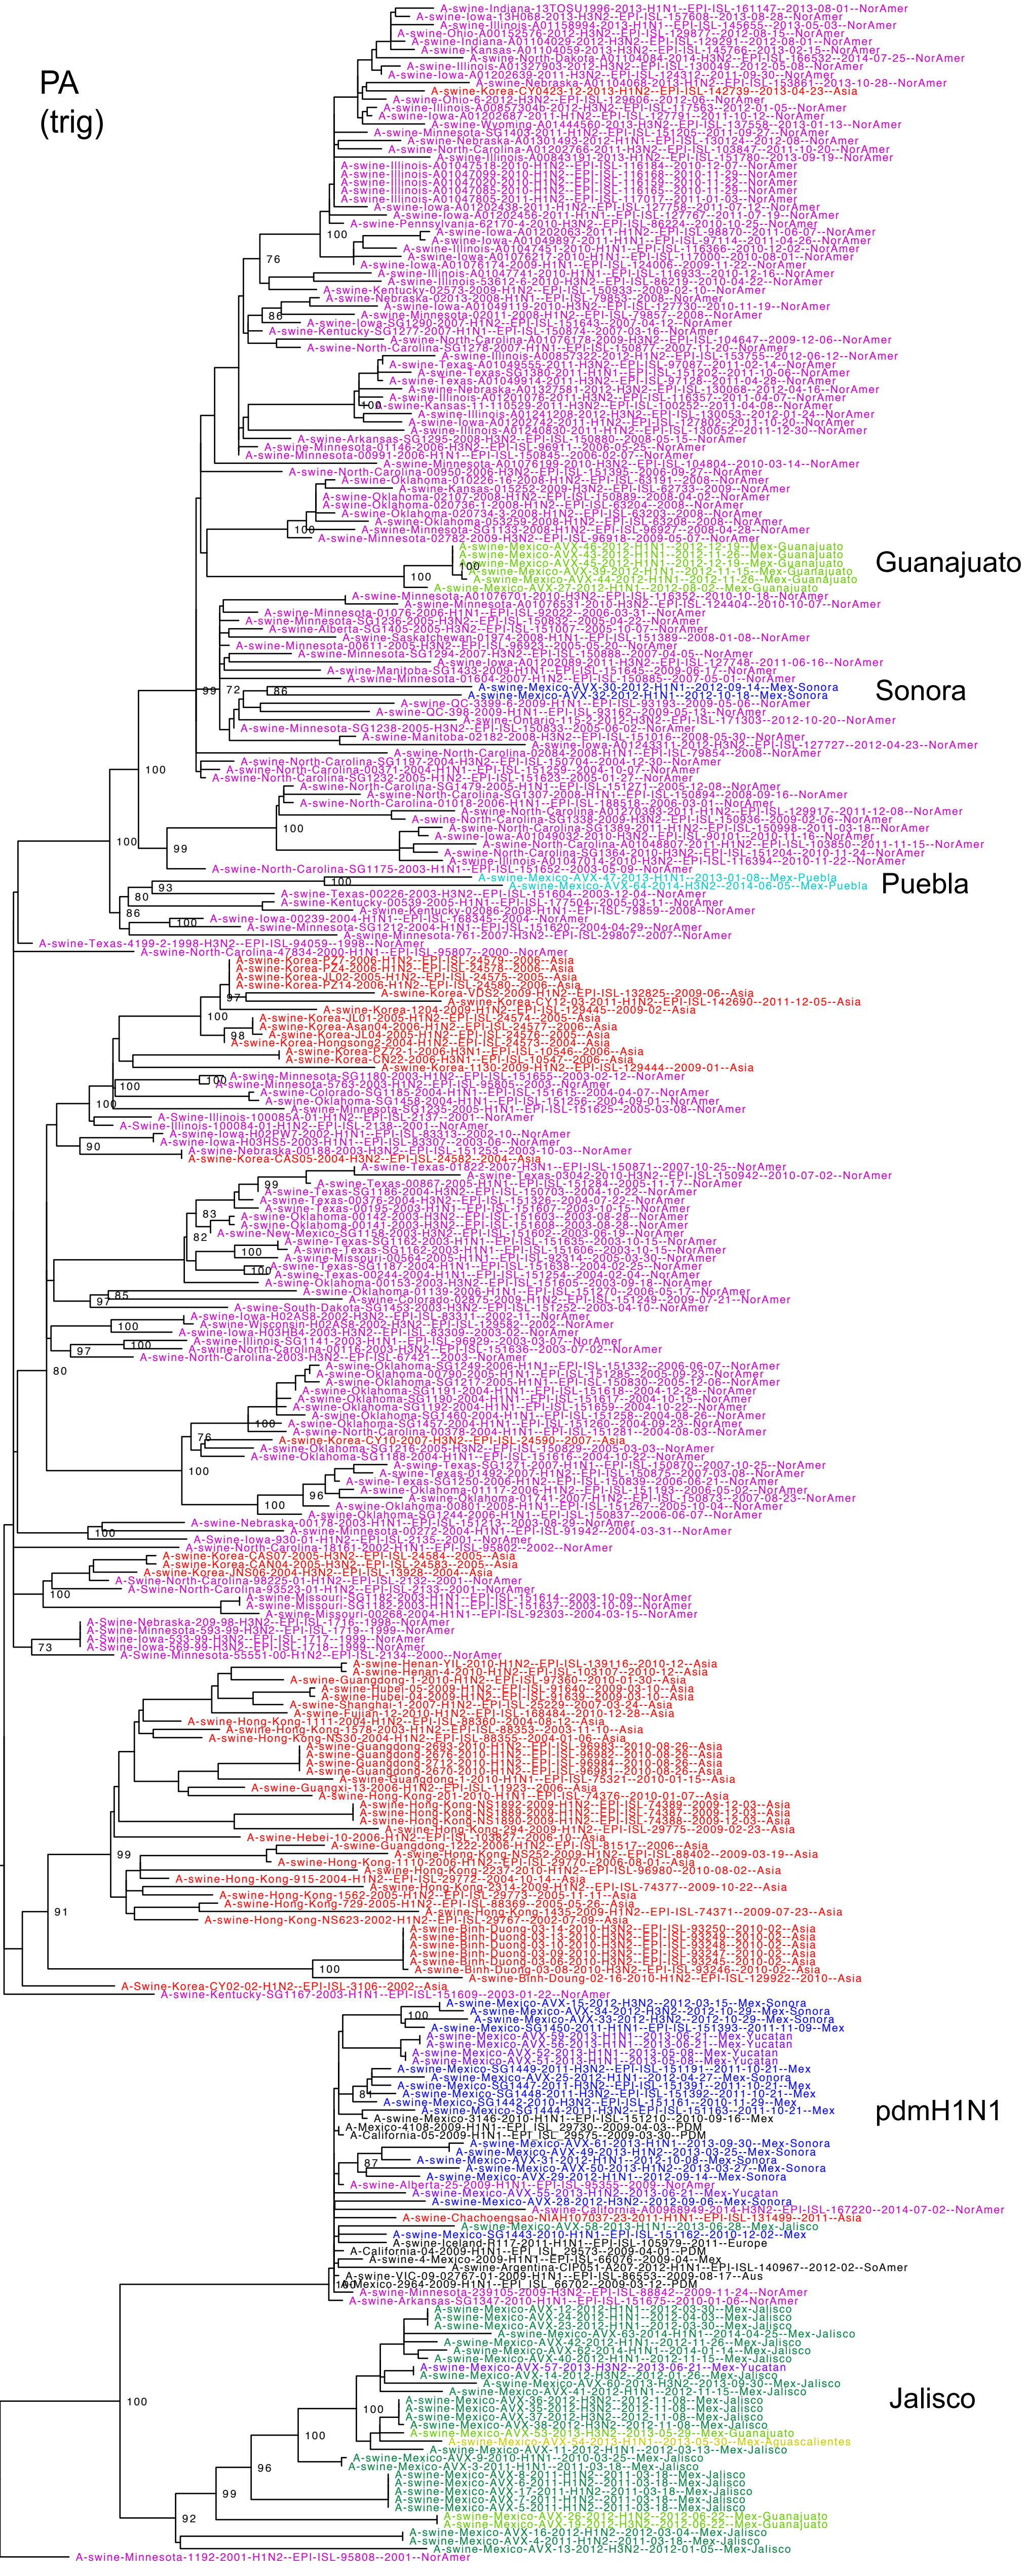

0.0060



# H1 (classical)

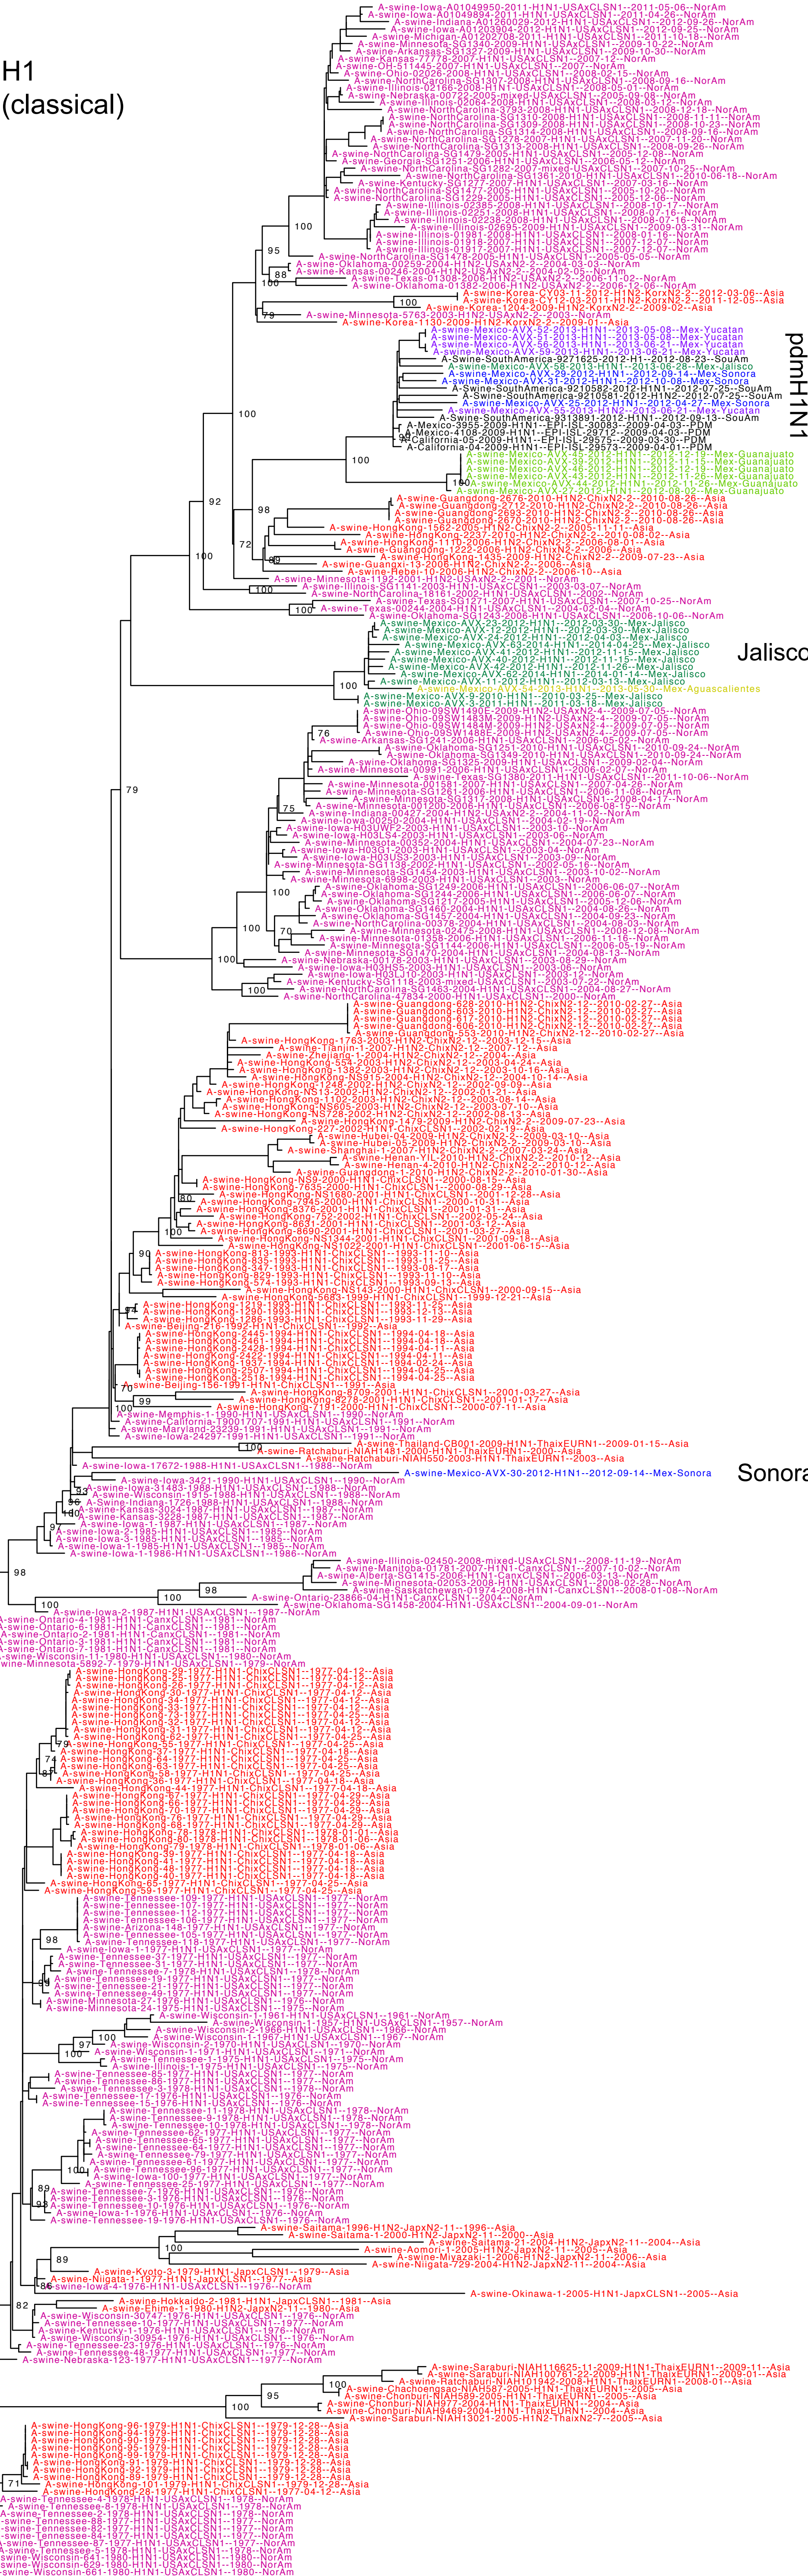

pdmH1N1

Guantanamo

Jalisco

Sonora



NP  
(trig/  
classical)

pdmH1N1

Jalisco/  
Guanajuato

Sonora

Puebla

Sonora

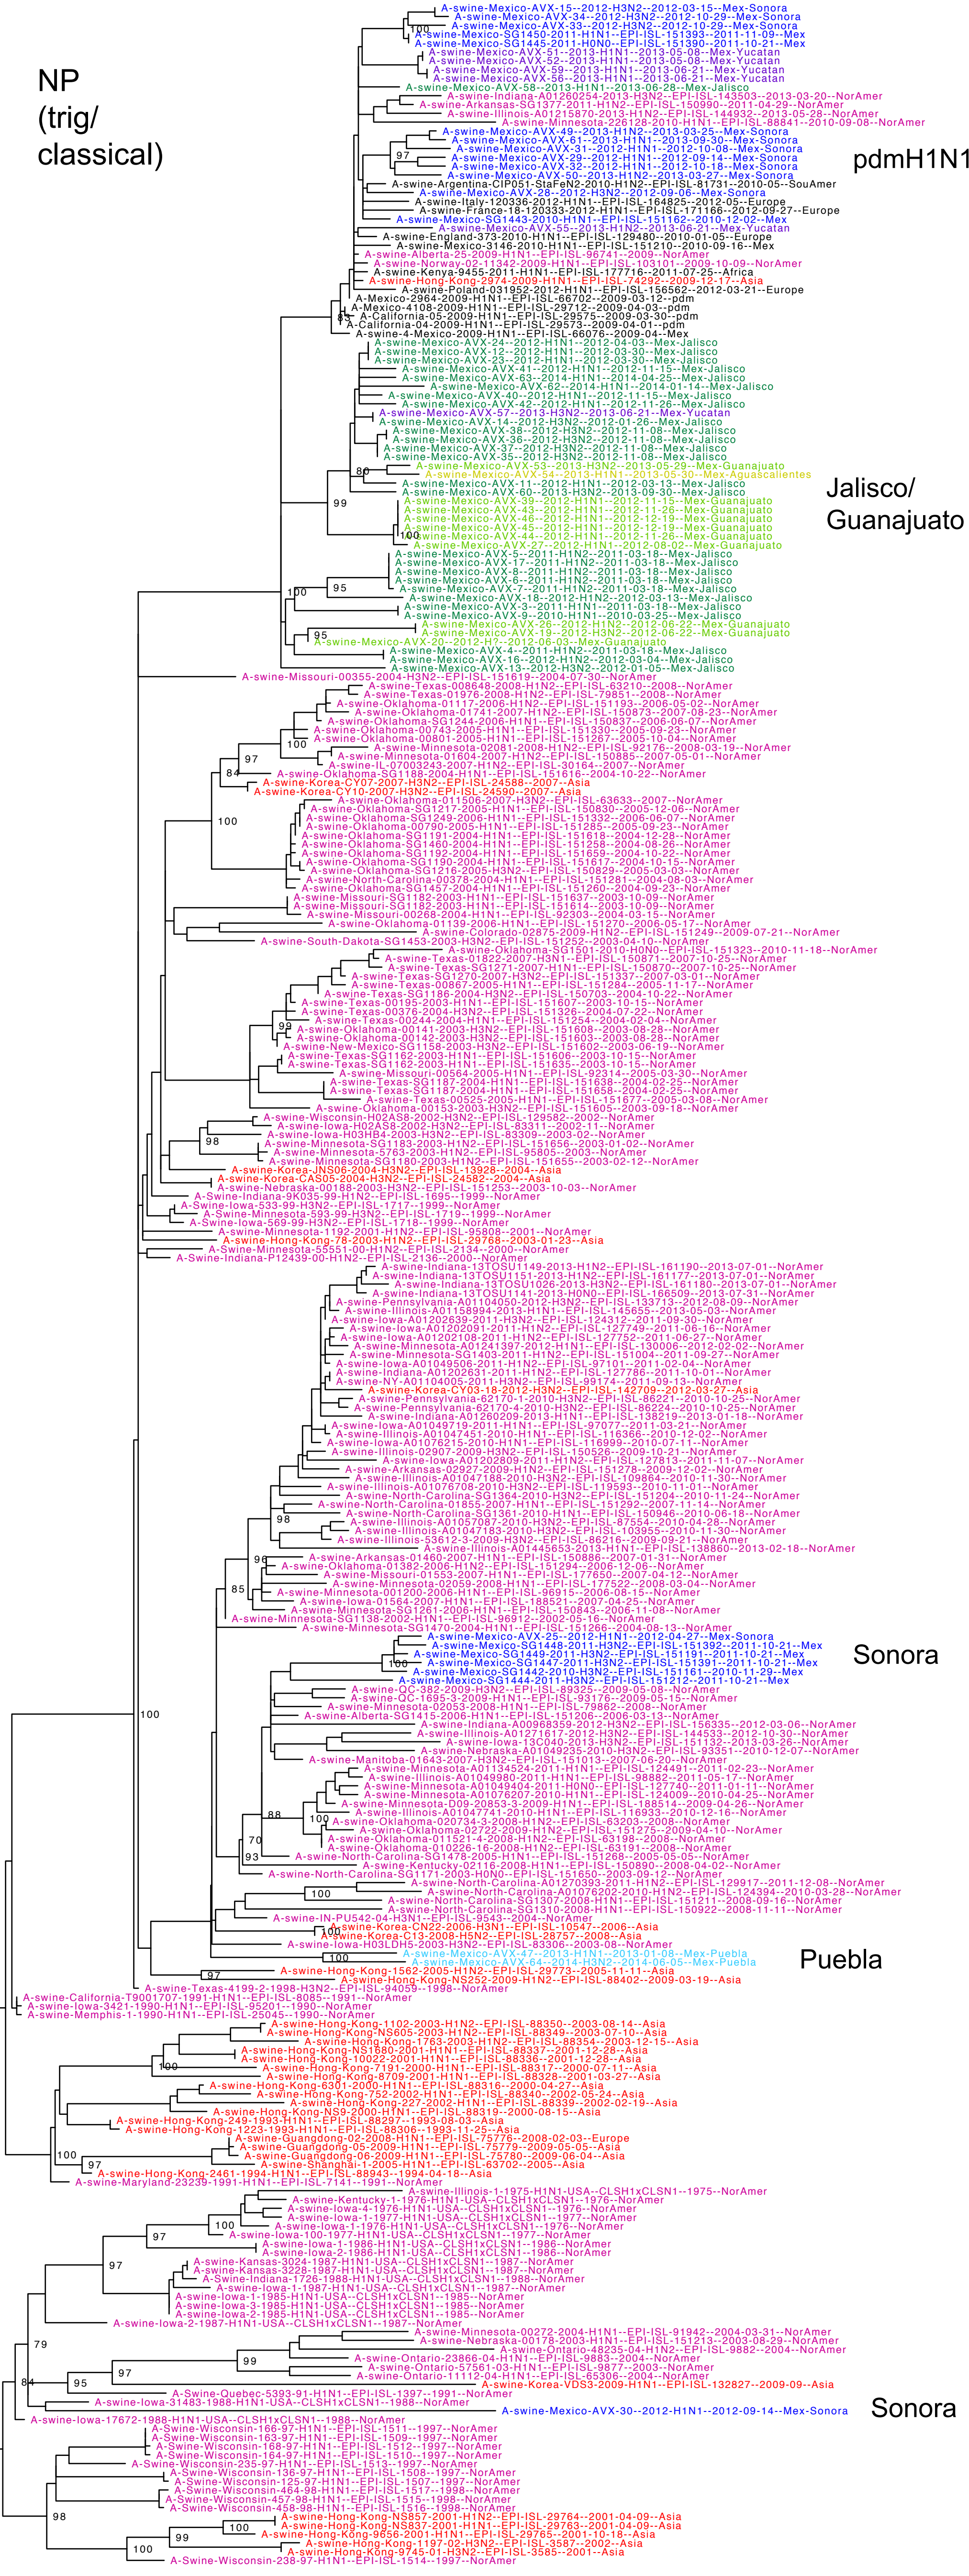

0.0080



MP  
(Eurasian)

pdmH1N1

Jalisco

Jalisco

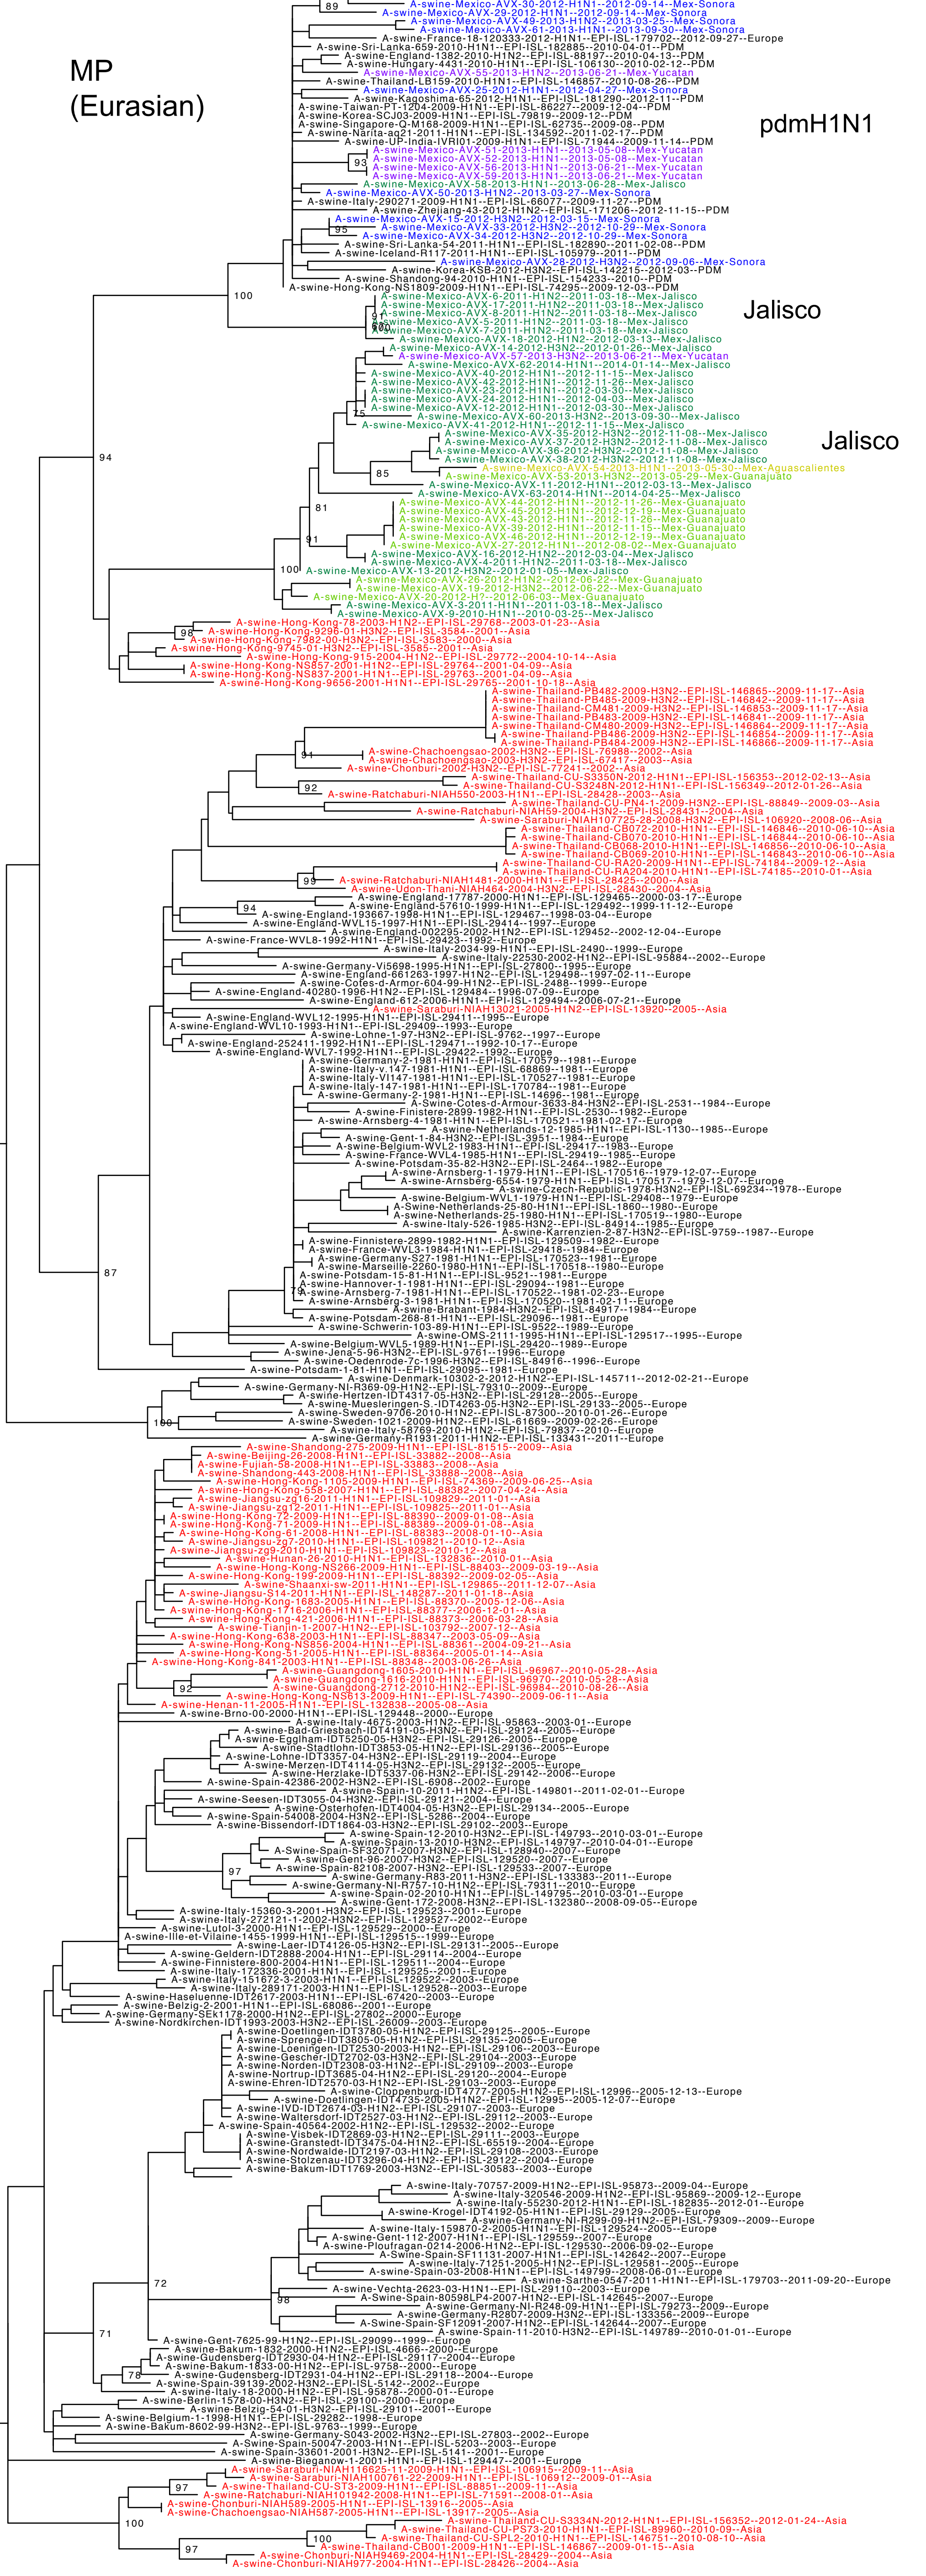

0.0070



NS (trig/classical)

Sonora

Sonora

Jalisco/Guanajuato

Puebla

pdmH1N1

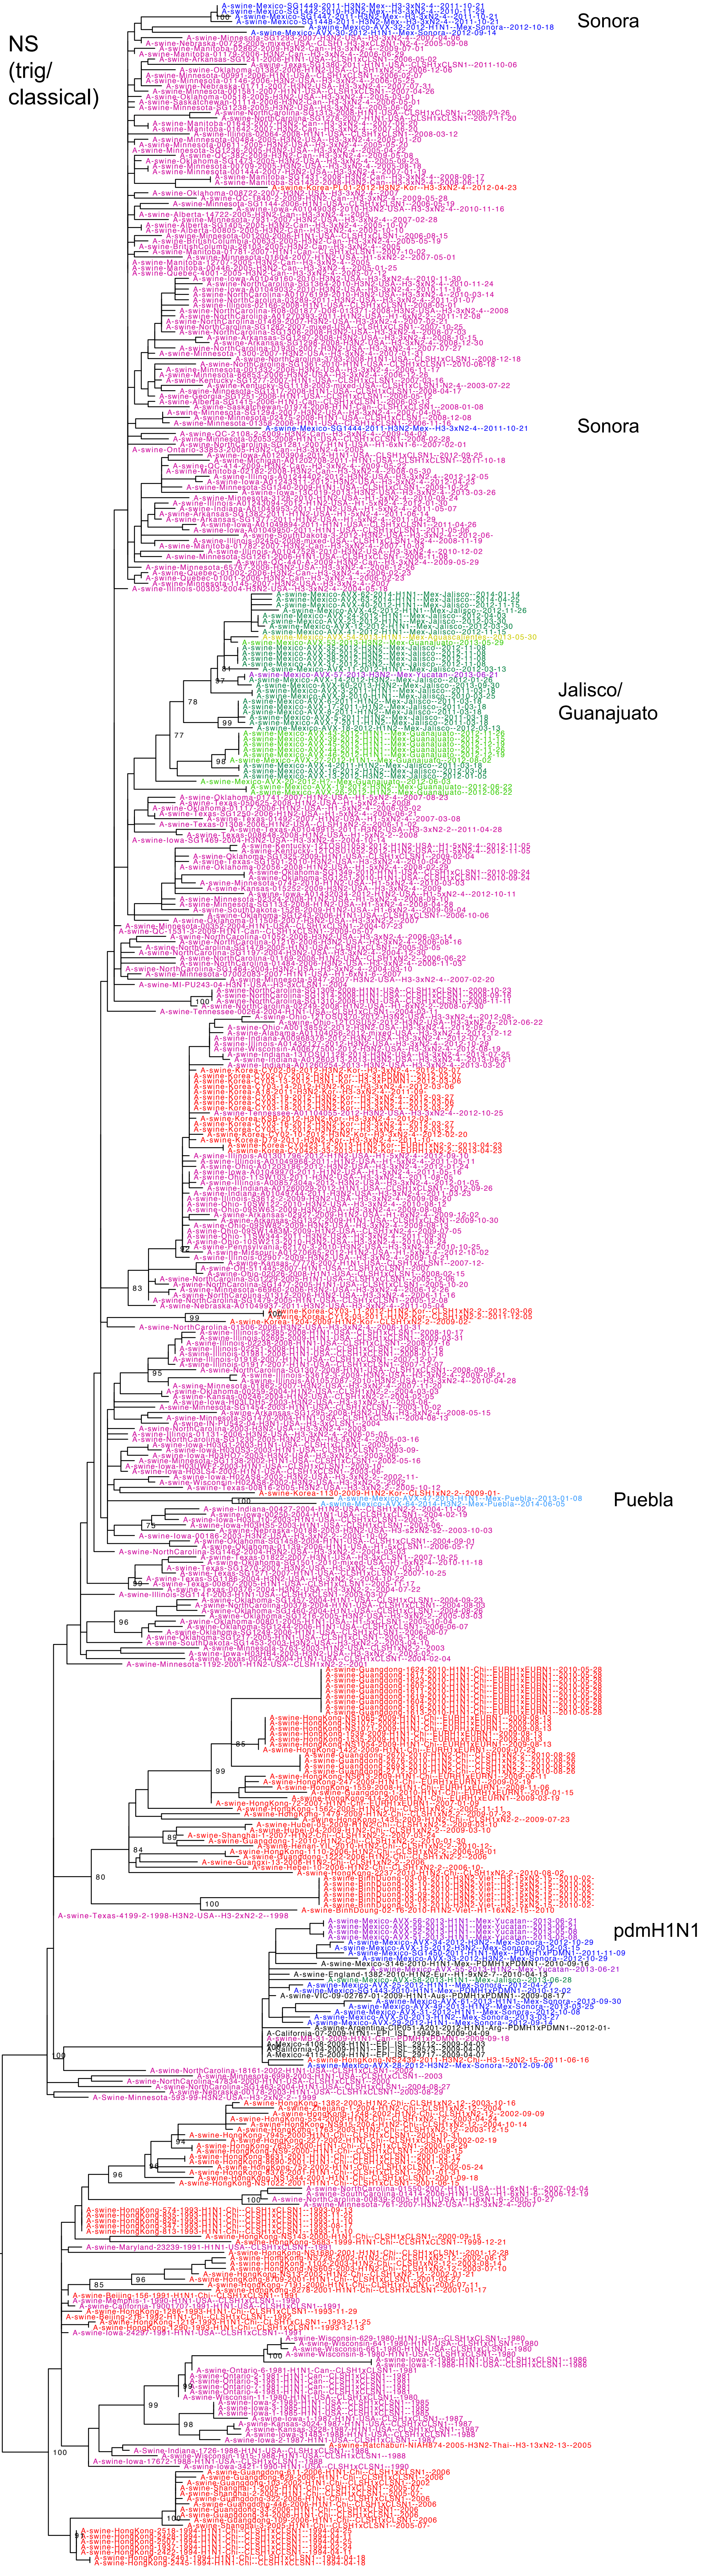

Supplement: supp [file elife-16777-supp-v1.zip]
