# Supplementary material for: Origins of the 2009 H1N1 influenza pandemic in swine in Mexico
Source: eLife journal article supplement (doi:10.7554/elife.16777), 2016-06-27
Supplement: supp [file elife-16777-supp-v1.zip]

# PB2 (TRIG)

- Key**
- USA/Canada
  - Asia
  - Mexico-Jalisco
  - Mexico-Yucatan
  - Mexico-Guanajuato
  - Mexico-Puebla
  - Mexico-Sonora
  - Mexico-Aguascalientes

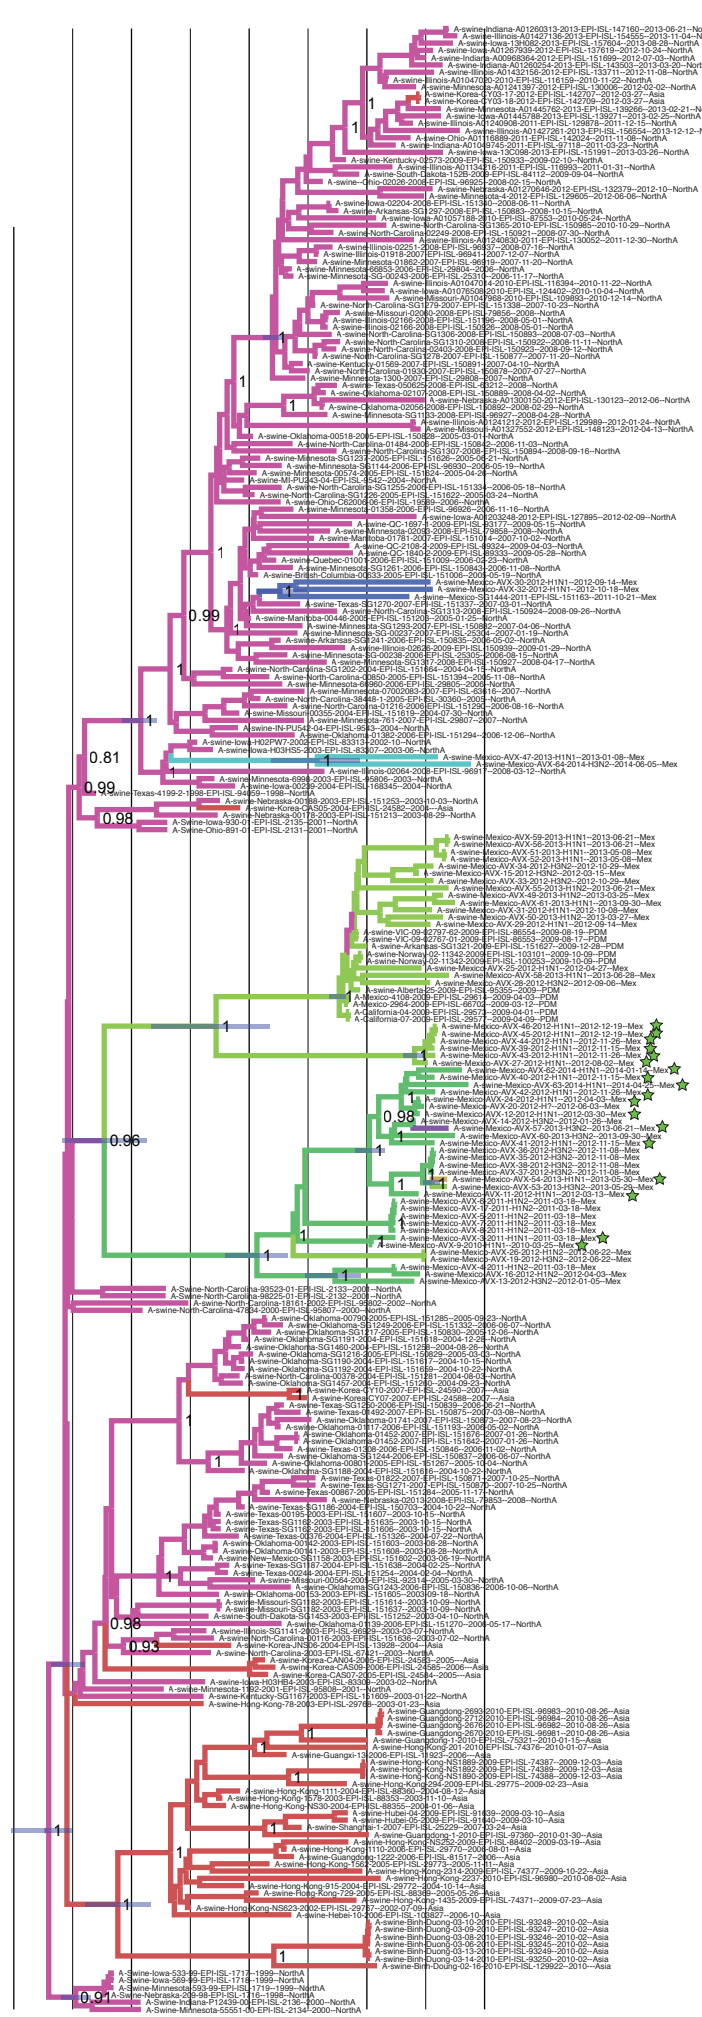

Sonora

Puebla

pdmH1N1

Guanajuato

Jalisco

1990 1995 2000 2005 2010 2015

# PB1 (TRIG)

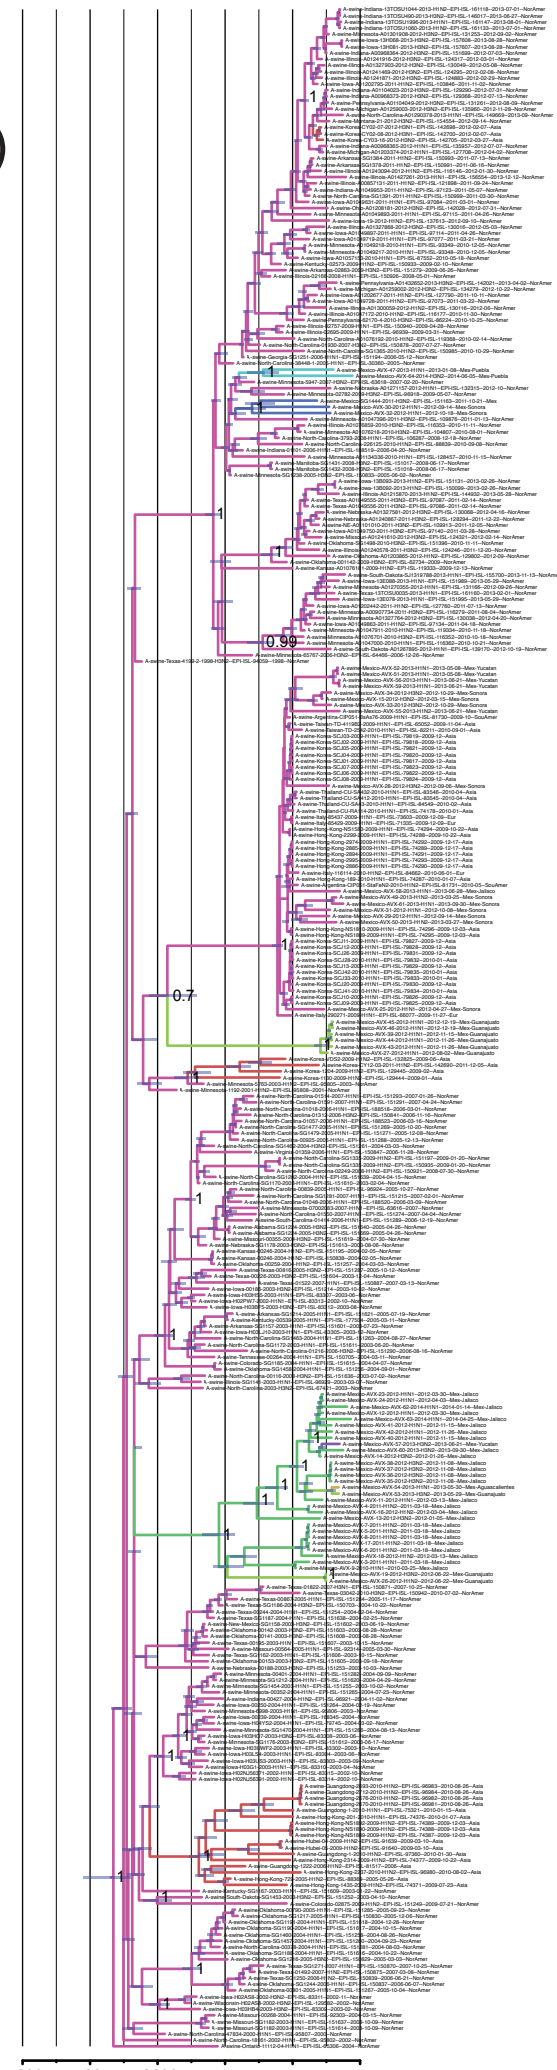

- ### Key
- USA/Canada
  - Asia
  - Mexico-Jalisco
  - Mexico-Yucatan
  - Mexico-Guanajuato
  - Mexico-Puebla
  - Mexico-Sonora
  - Mexico-Aguascalientes

Puebla  
Sonora

pdmH1N1

Guanajuato

Jalisco

1990 1995 2000 2005 2010 2015



# H1 classical

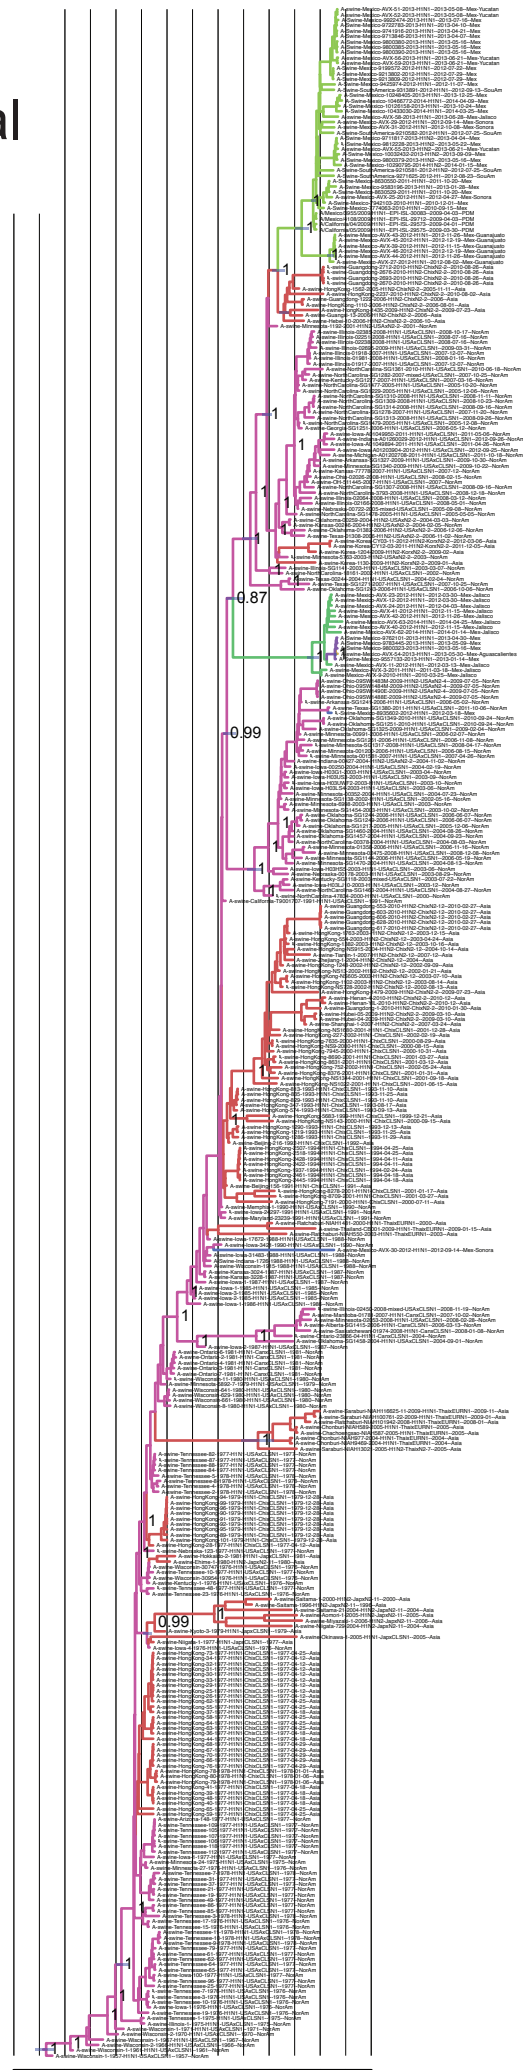

pdmH1N1

Guanajuato

Jalisco  
Yucatan  
Sonora

Sonora

## Key

- USA/Canada
- Asia
- Mexico-Jalisco
- Mexico-Yucatan
- Mexico-Guanajuato
- Mexico-Puebla
- Mexico-Sonora
- Mexico-Aguascalientes

1950 1960 1970 1980 1990 2000 2010 2020



# H1 (Eurasian)

## Key

- Asia
- Mexico-Puebla
- Europe

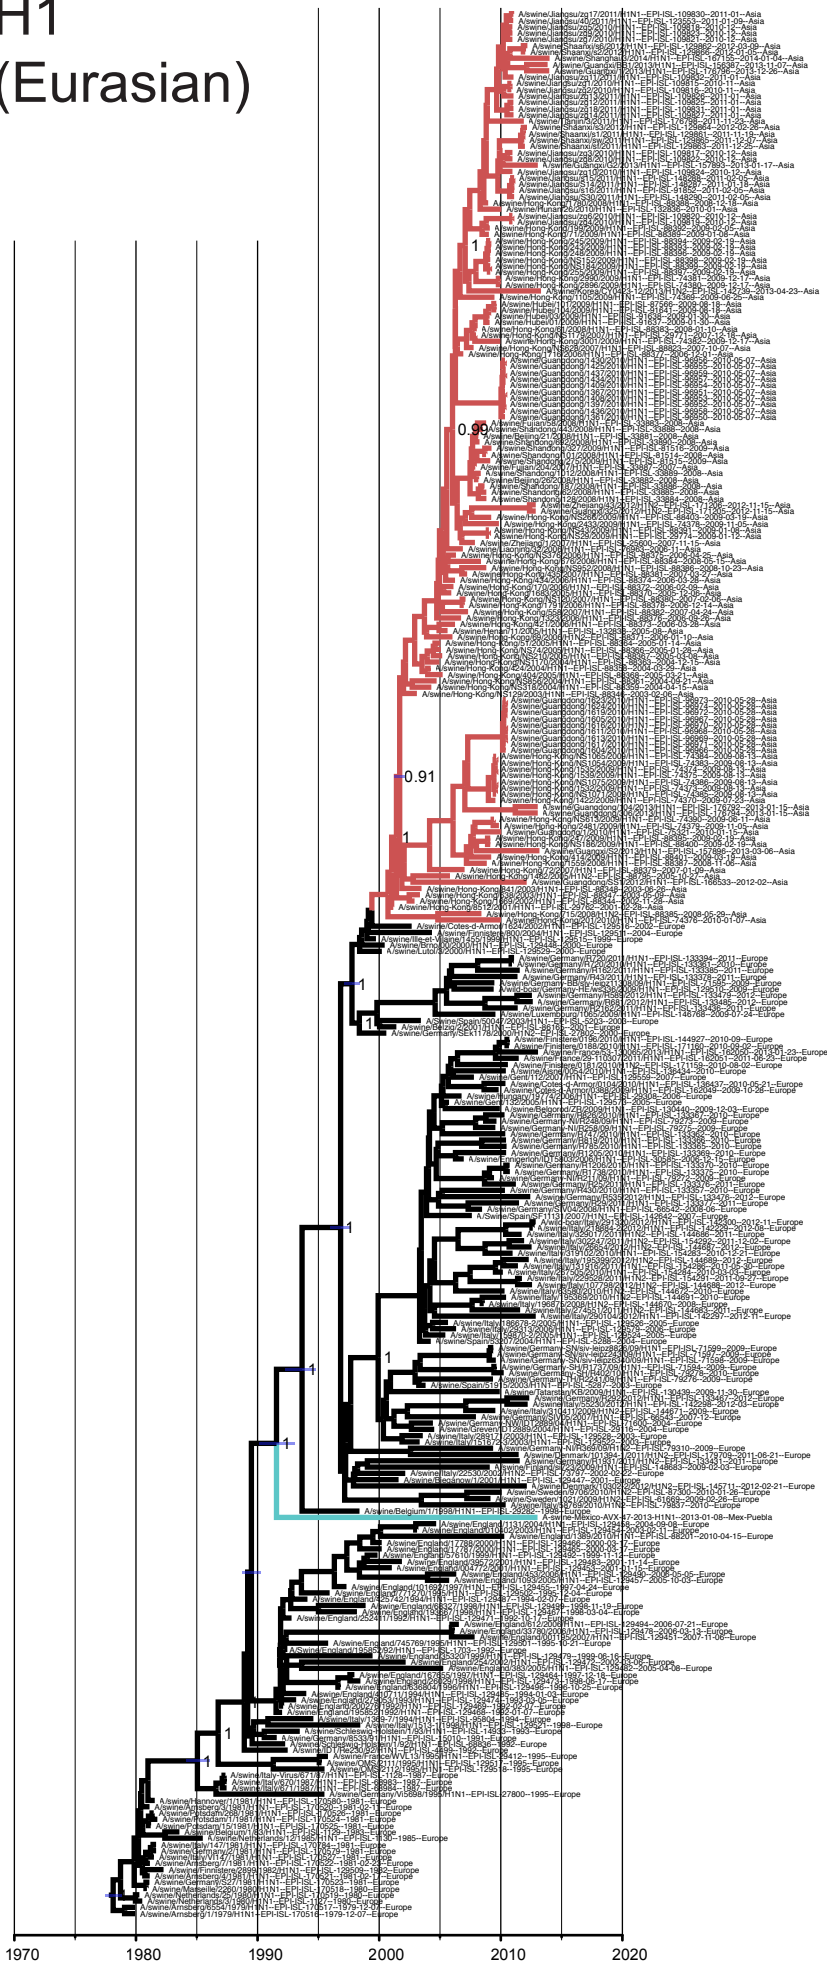

Puebla

# H3 (human seasonal)

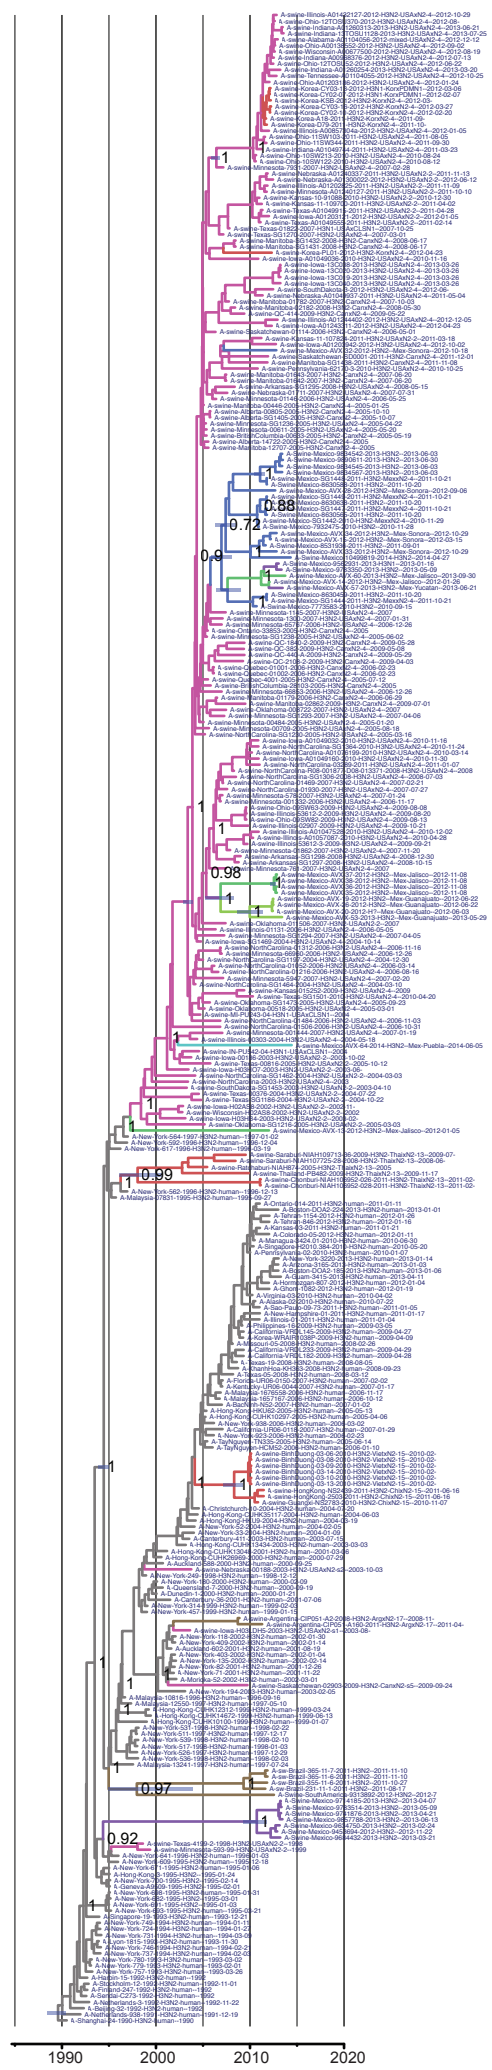

## Key

- human seasonal H3N2
- USA/Canada
- Asia
- Mexico-Jalisco
- Mexico-Yucatan
- Mexico-Guanajuato
- Mexico-Puebla
- Mexico-Sonora
- South America

Sonora

Sonora

Jalisco  
Guanajuato

Puebla

Jalisco

Yucatan

1990 2000 2010 2020

# H1 (human seasonal)

## Key

- human seasonal H1N1
- USA/Canada
- Asia
- Mexico-Jalisco
- Mexico-Yucatan
- Mexico-Guanajuato
- Mexico-Puebla
- Mexico-Sonora
- South America
- Europe

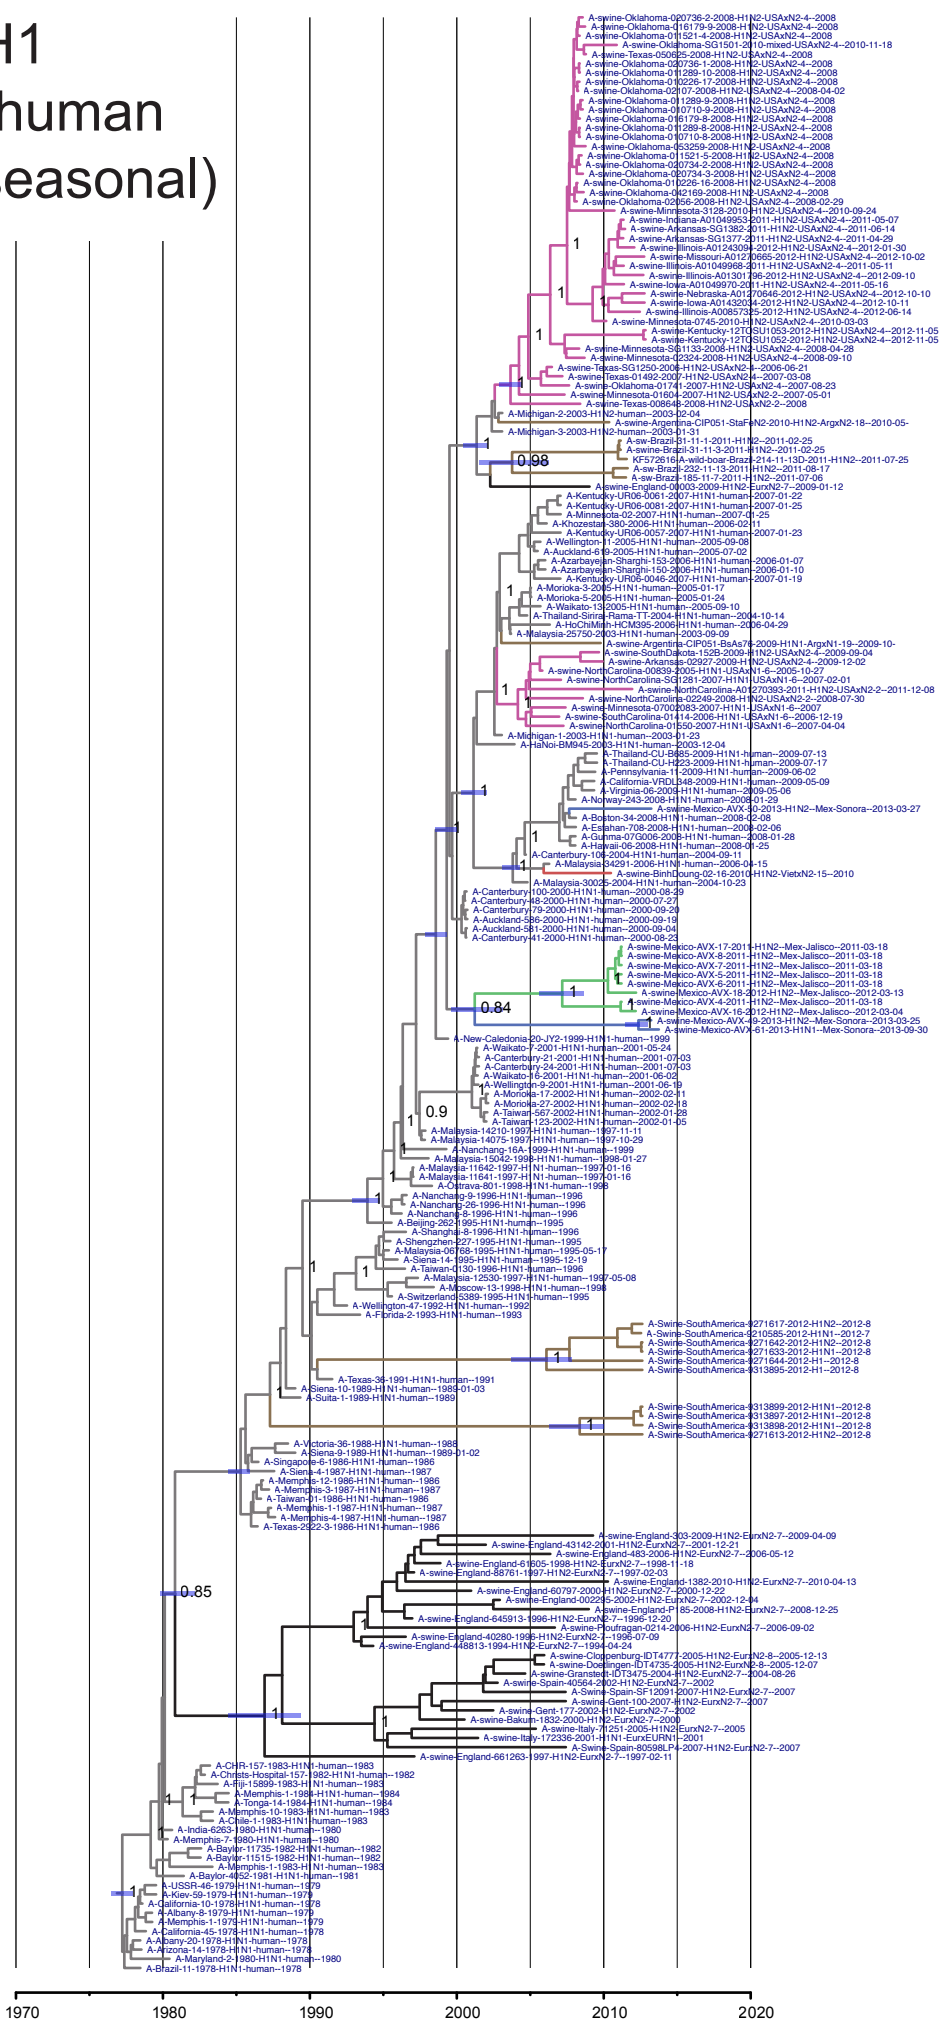

Sonora

Jalisco  
Sonora

1970 1980 1990 2000 2010 2020

# NP (TRIG)

## Key

- USA/Canada
- Asia
- Mexico-Jalisco
- Mexico-Yucatan
- Mexico-Guanajuato
- Mexico-Puebla
- Mexico-Sonora
- Mexico-Aguascalientes

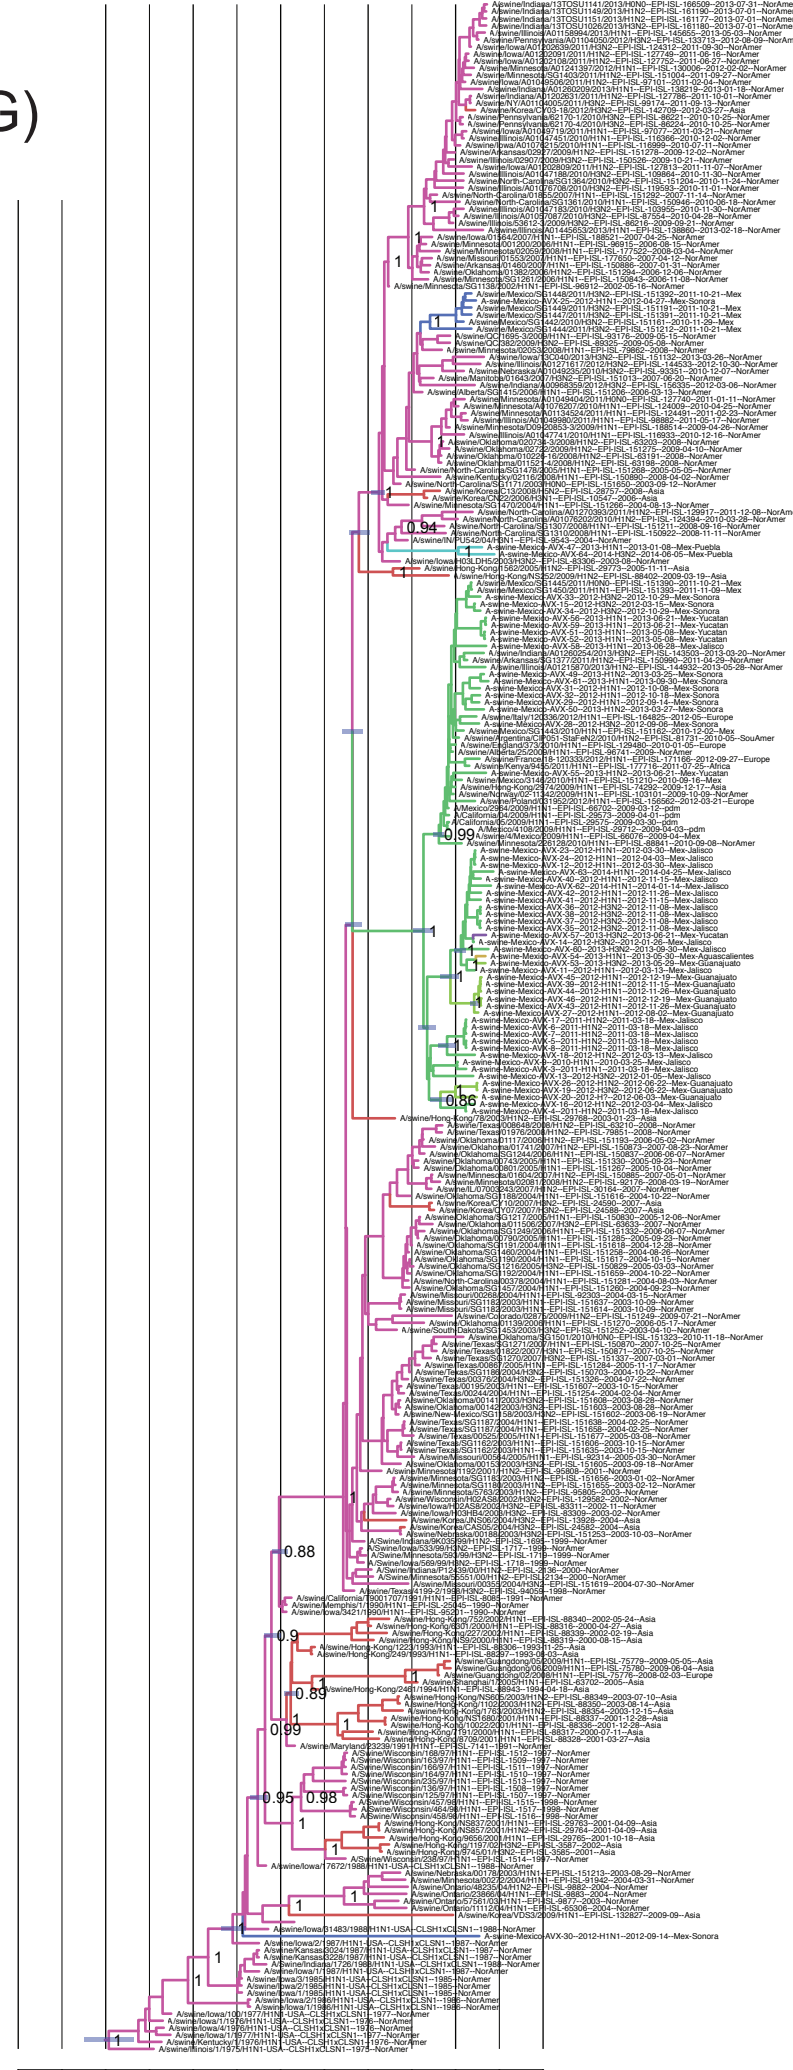

Sonora

Puebla

pdmH1N1

Jalisco/  
Guanajuato

Sonora

1960 1970 1980 1990 2000 2010 2020



# N1 (Eurasian)

## Key

- Europe
- Asia
- Mexico-Jalisco
- Mexico-Yucatan
- Mexico-Guanajuato
- Mexico-Puebla
- Mexico-Sonora
- Mexico-Aguascalientes

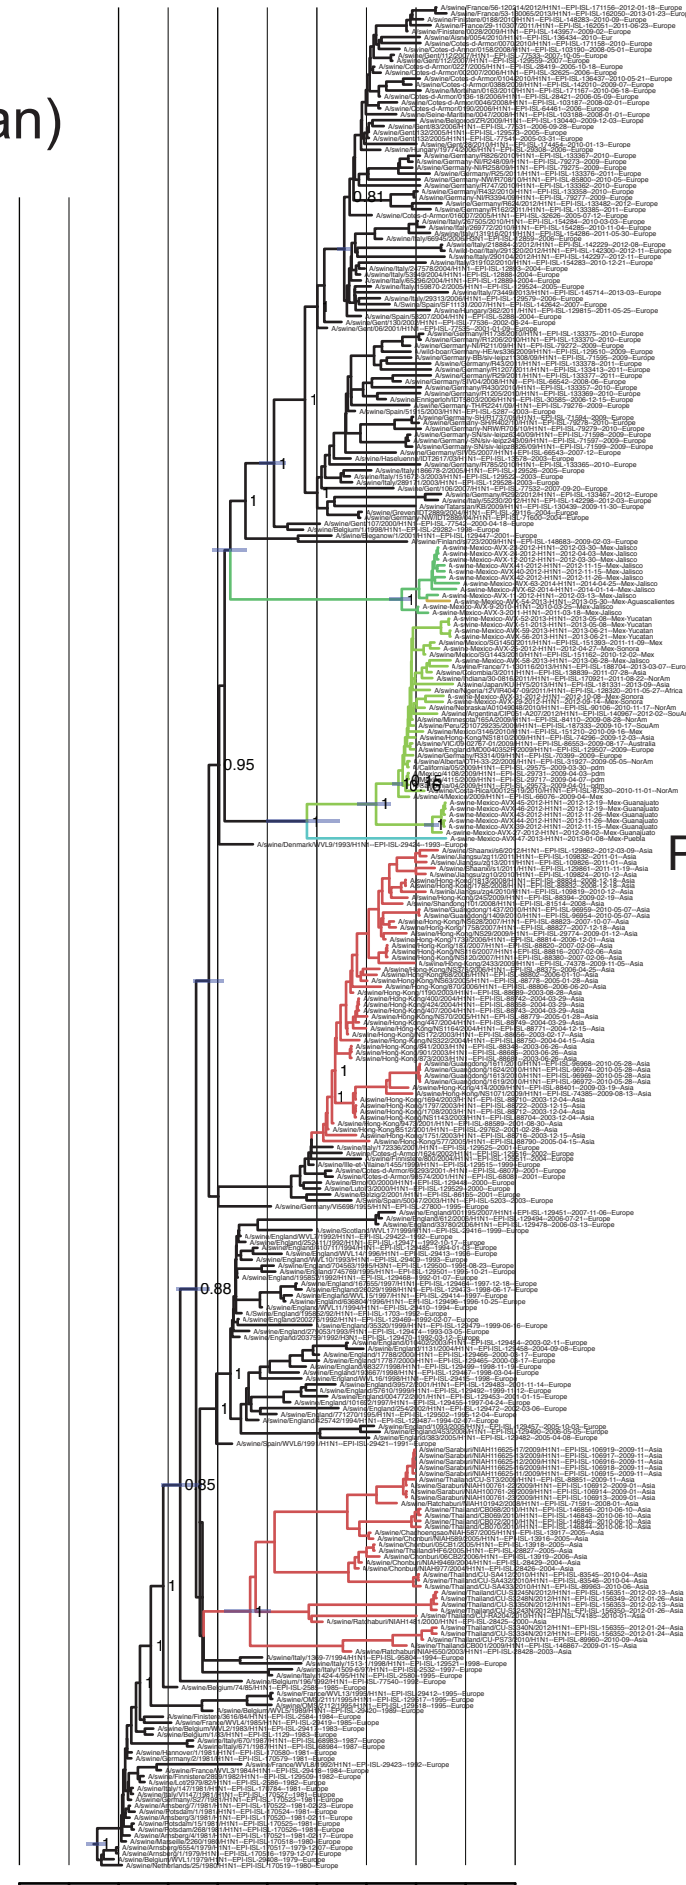

Jalisco

pdmH1N1

Guanajuato

Puebla

# N1 (classical)

## Key

- human seasonal H3N2
- Asia
- Mexico-Sonora
- Europe

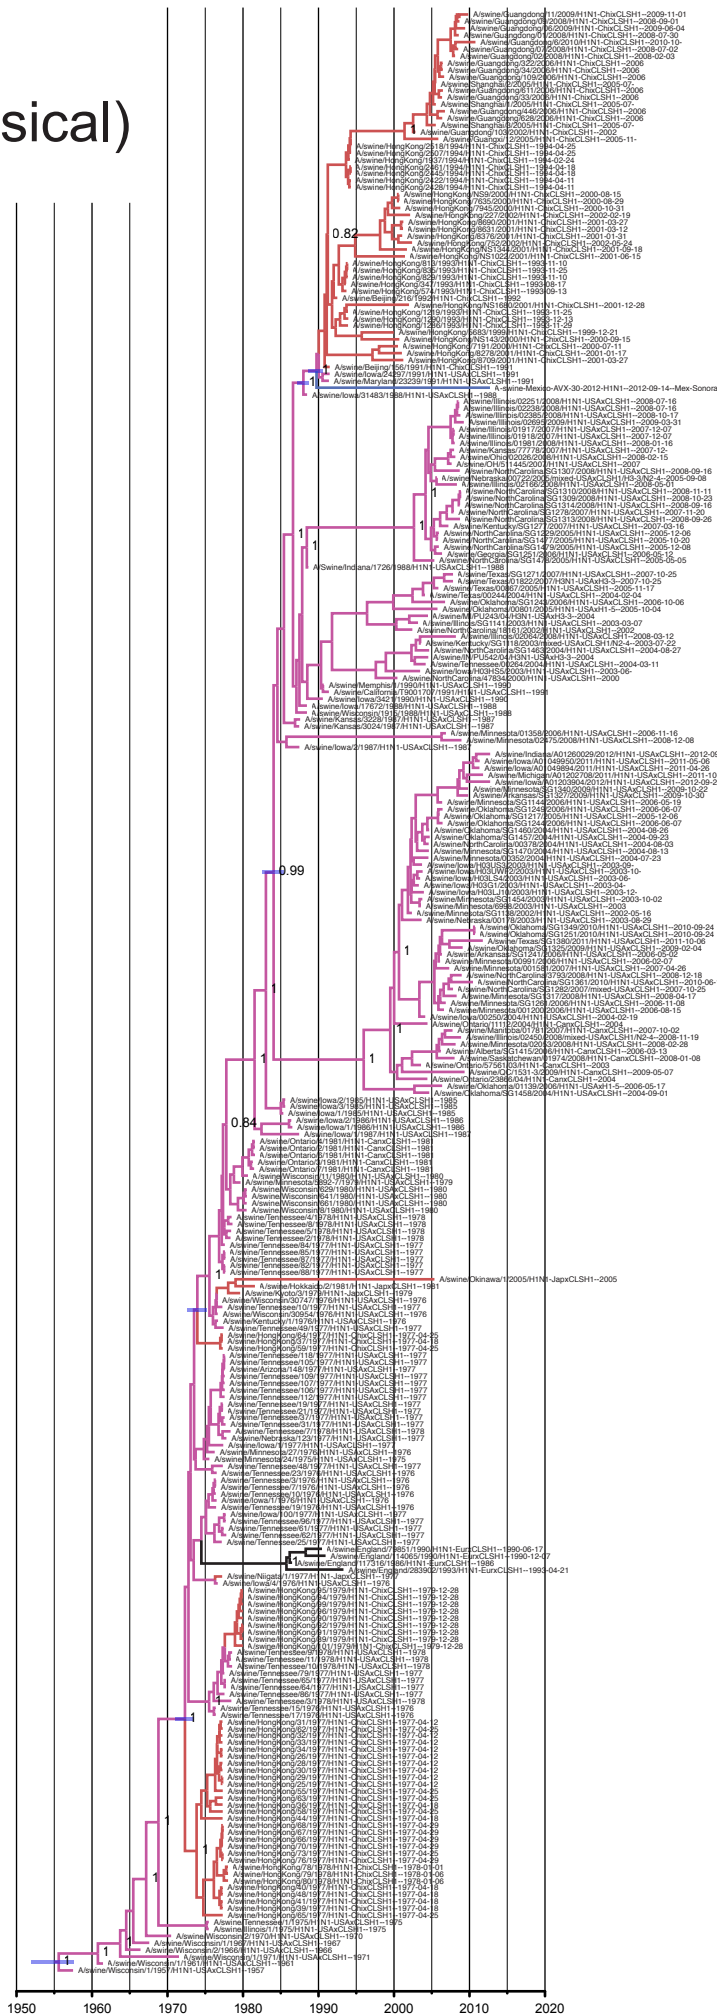

Sonora

1950 1960 1970 1980 1990 2000 2010 2020

N2  
(human  
seasonal)

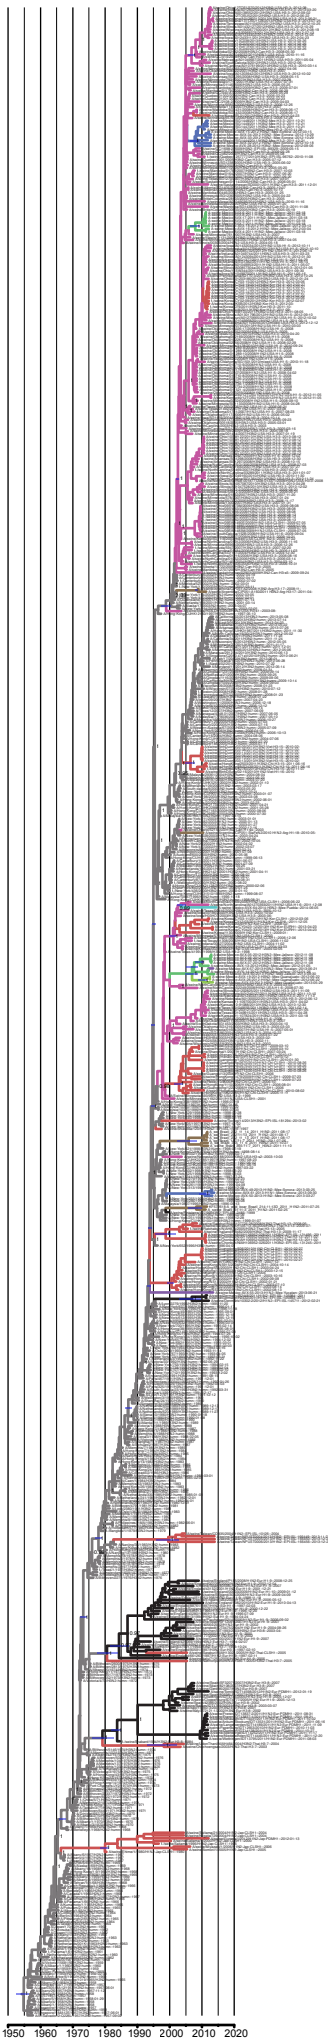

Sonora  
Jalisco

Puebla  
Guanajuato/Jalisco

Sonora  
Yucatan

**Key**

- human seasonal H3N2
- USA/Canada
- Asia
- Mexico-Jalisco
- Mexico-Yucatan
- Mexico-Guanajuato
- Mexico-Puebla
- Mexico-Sonora
- South America
- Europe

1950 1960 1970 1980 1990 2000 2010 2020





# MP (TRIG/ classical)

## Key

- USA/Canada
- Asia
- Mexico-Puebla
- Mexico-Sonora

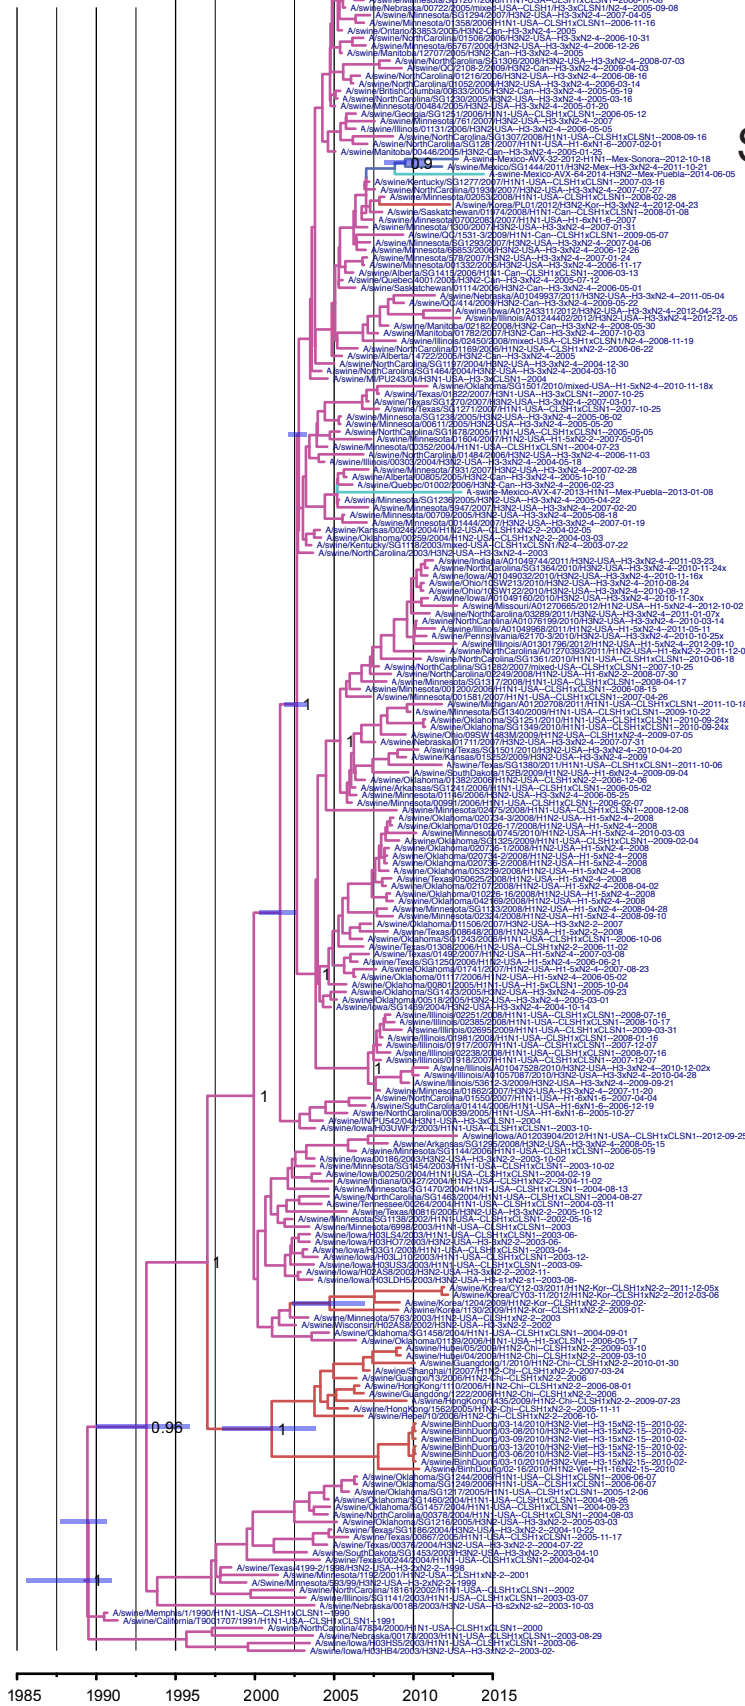

Sonora  
Puebla

Puebla

1985 1990 1995 2000 2005 2010 2015

NS  
(TRIG/  
classical)

Key

- USA/Canada
- Asia
- Mexico-Jalisco
- Mexico-Yucatan
- Mexico-Guanajuato
- Mexico-Puebla
- Mexico-Sonora
- Mexico-Aguascalientes

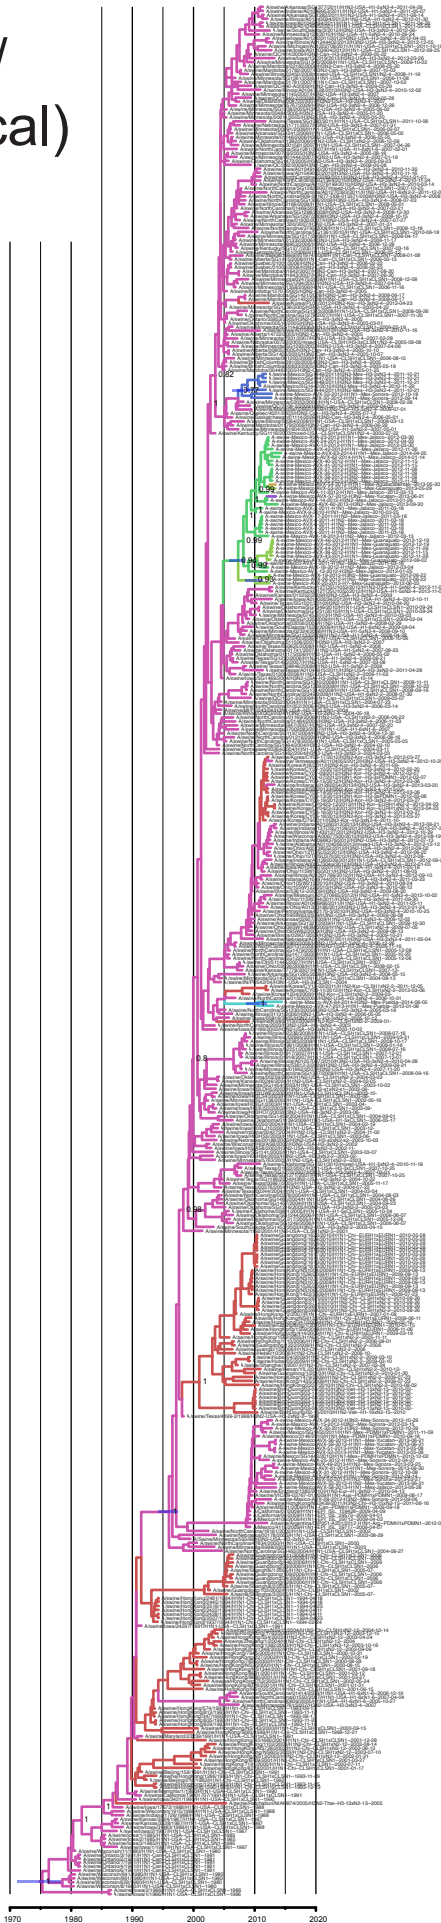

Sonora

Jalisco  
Guanajuato

Puebla

pdmH1N1
