# Supplementary figures and images for: Origins of the 2009 H1N1 influenza pandemic in swine in Mexico
Source: eLife journal article supplement (doi:10.7554/elife.16777), 2016-06-27

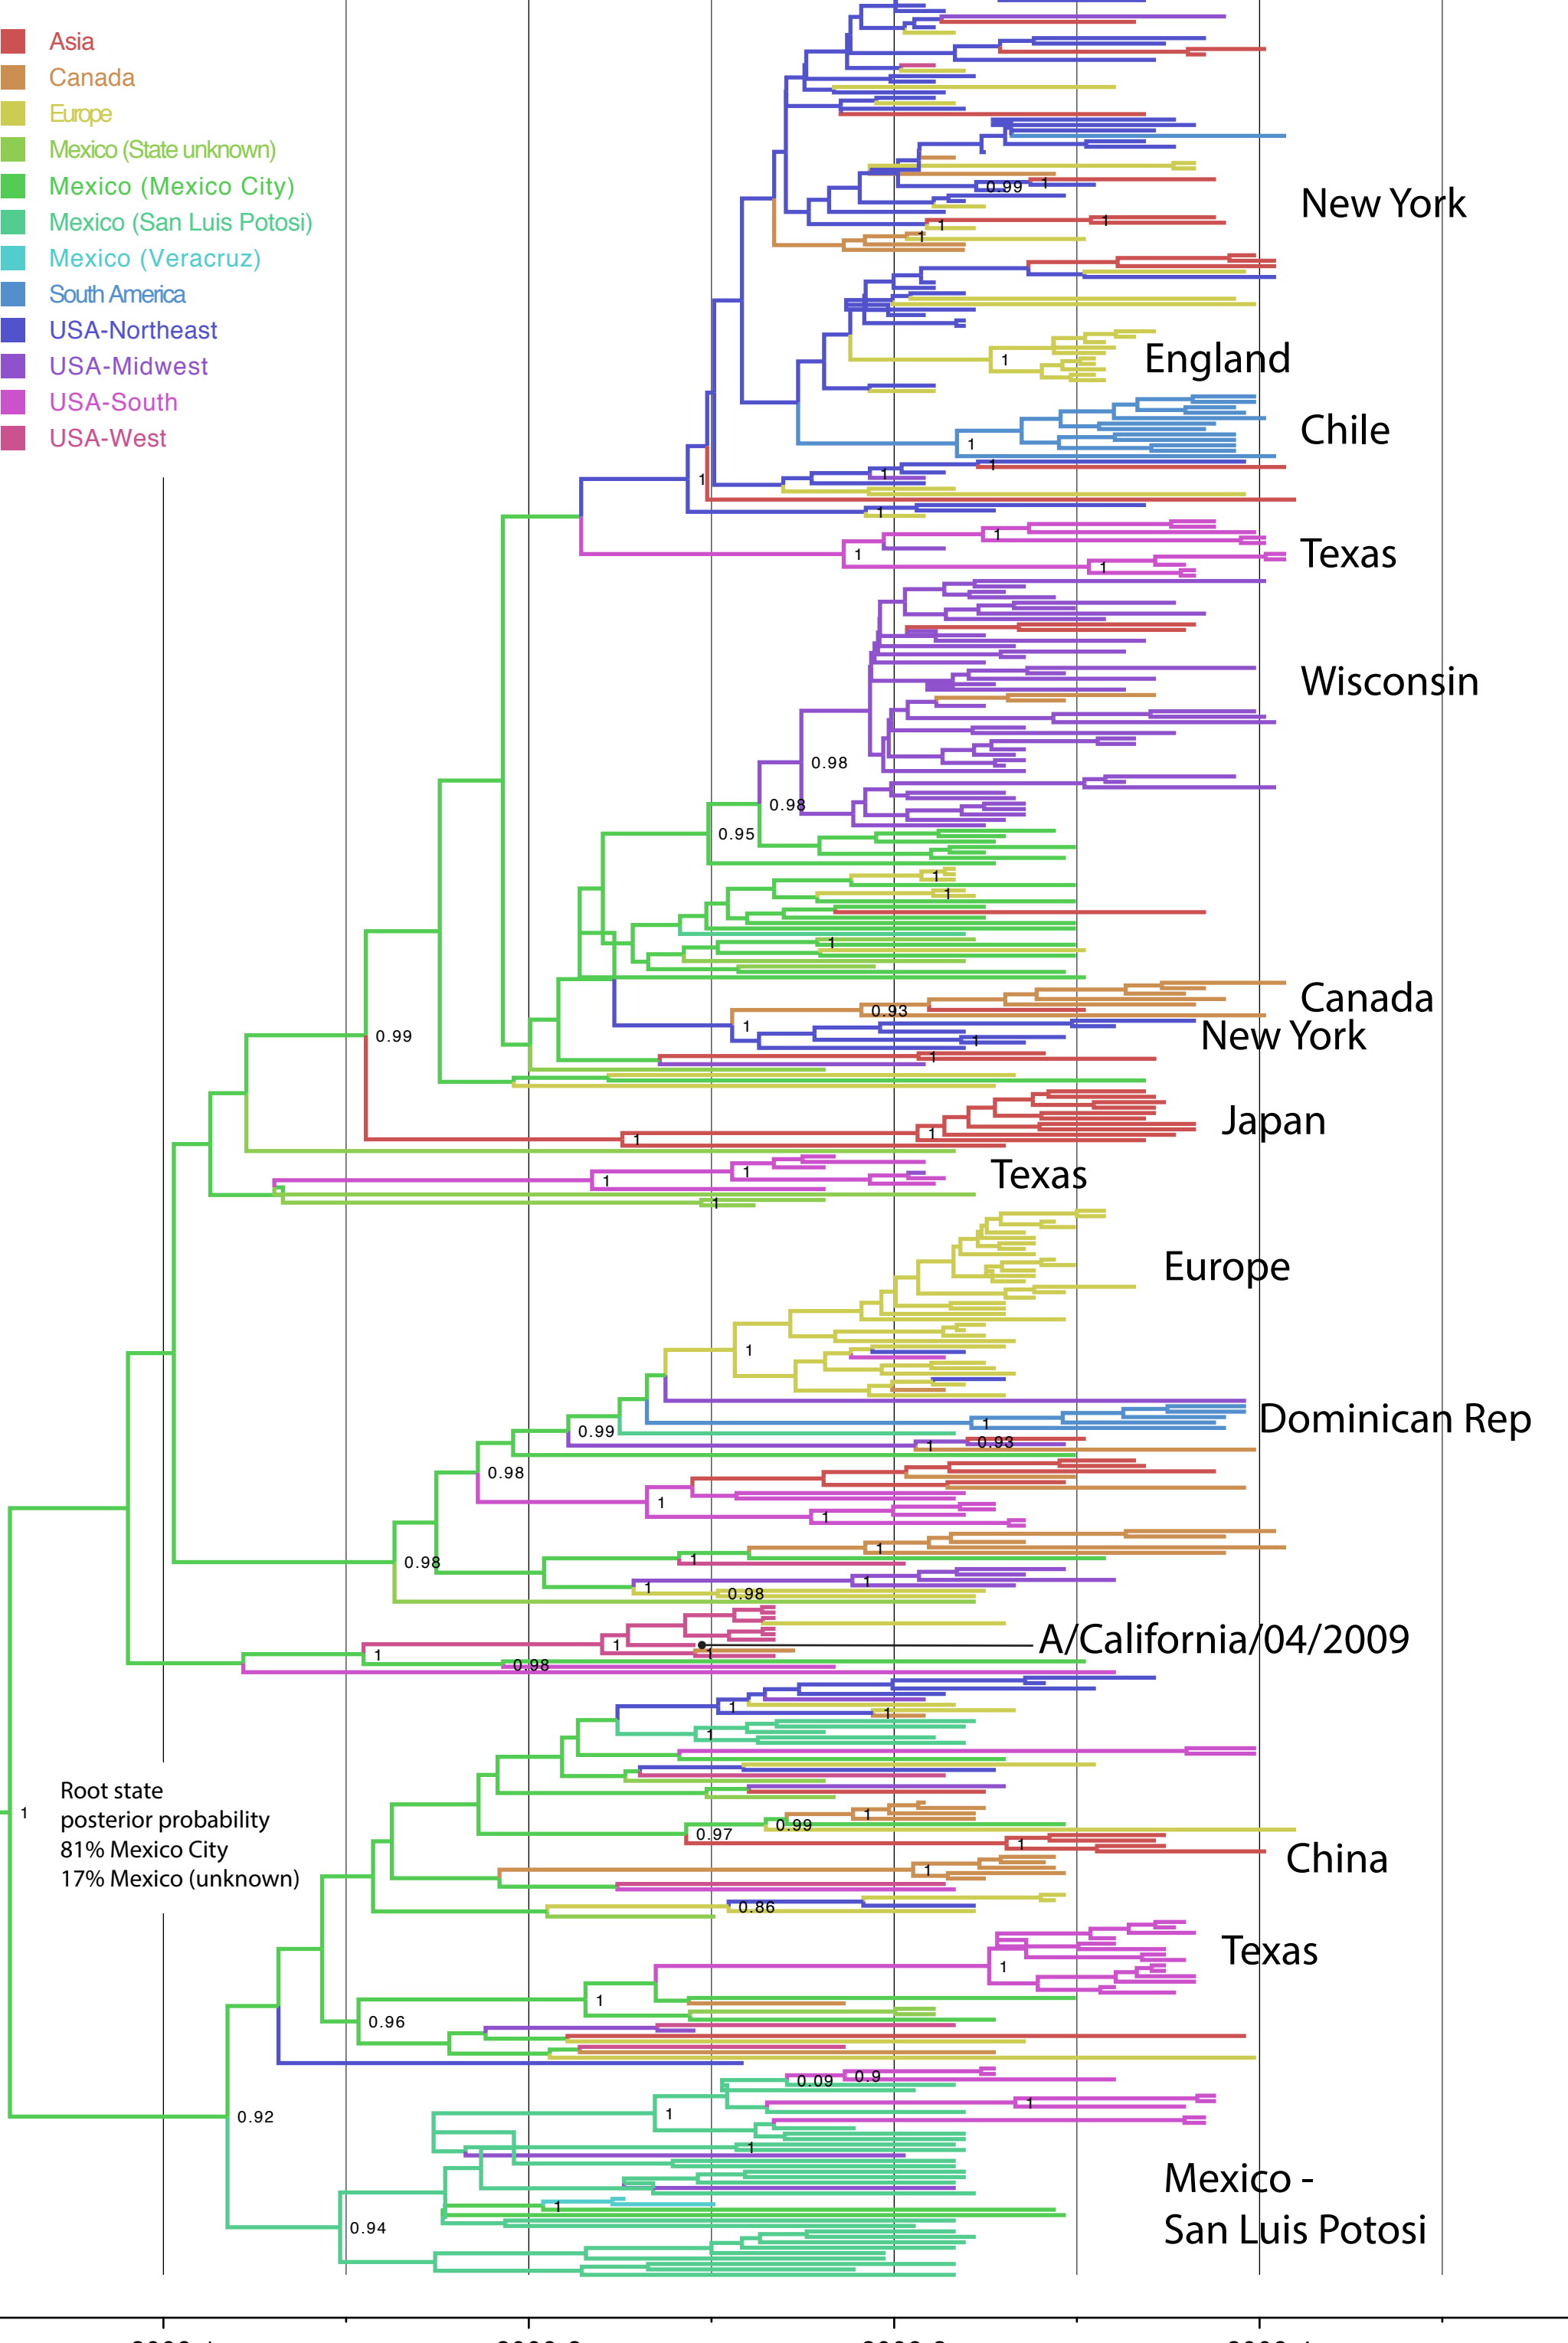

Supplement: supp [file elife-16777-supp-v1.zip]

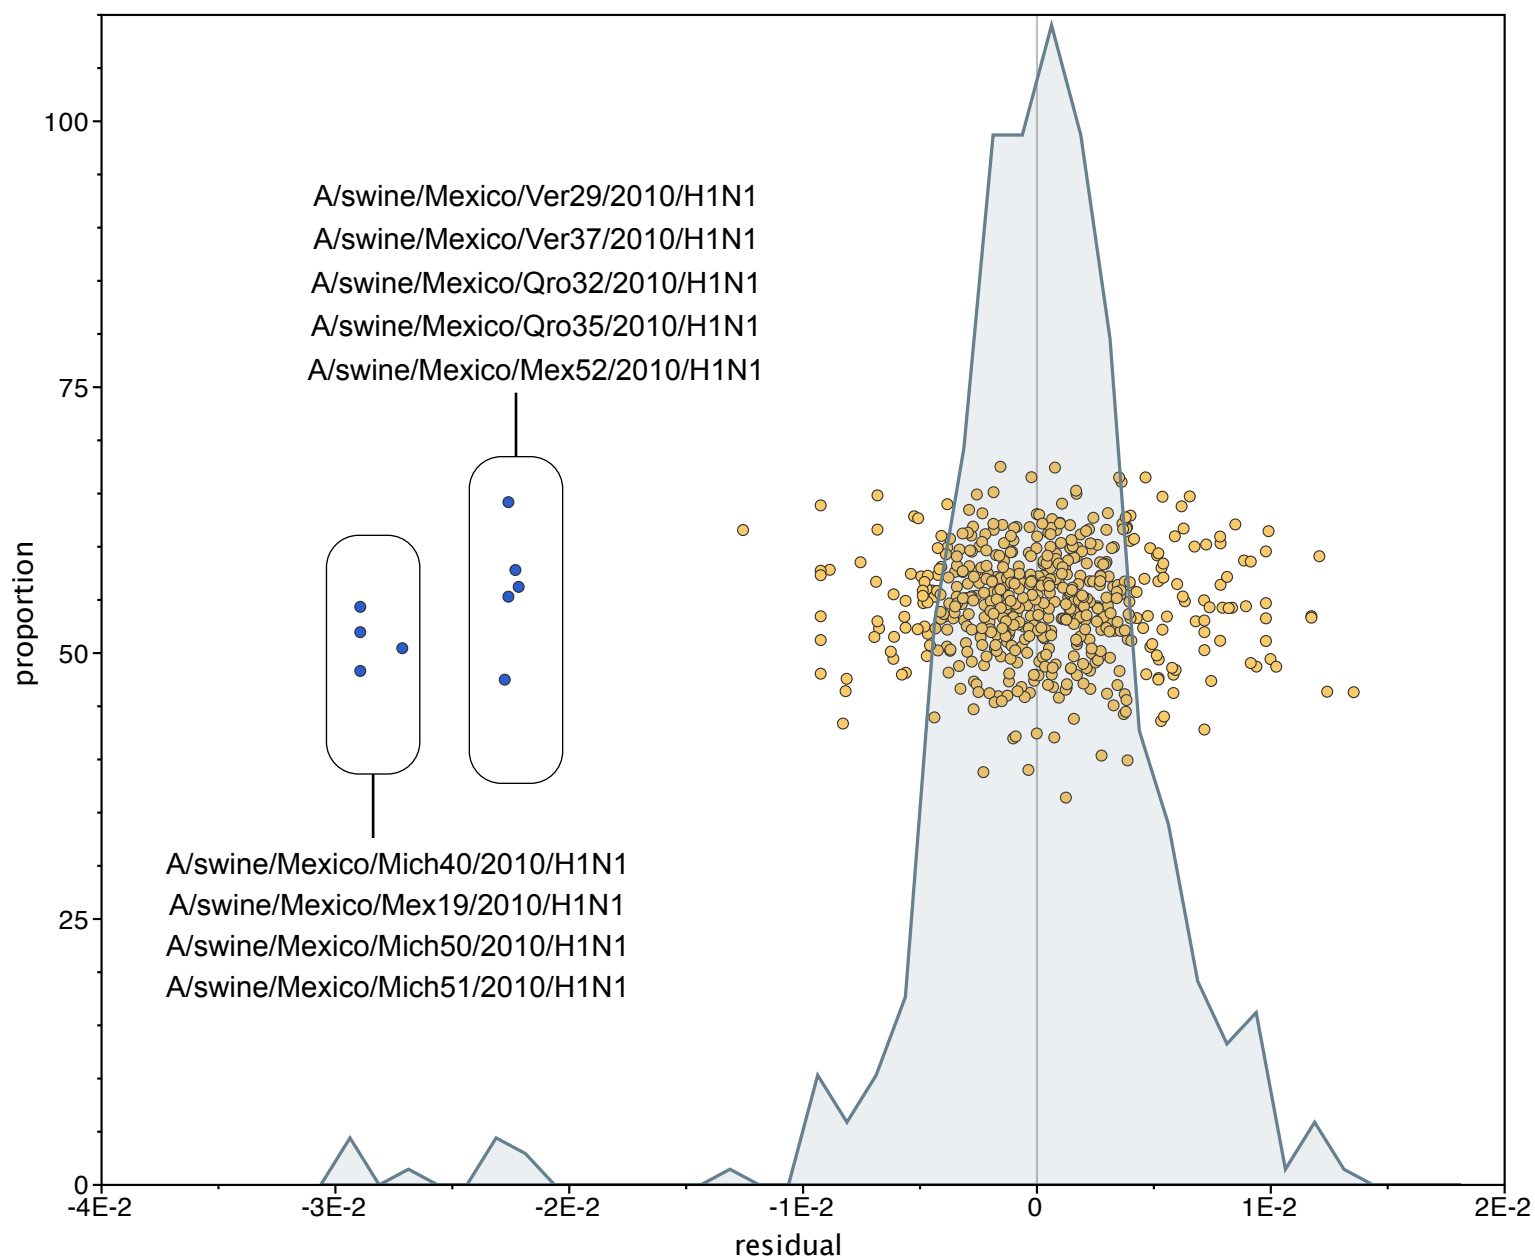

Supplement: supp [file elife-16777-supp-v1.zip]

# Viral Importations

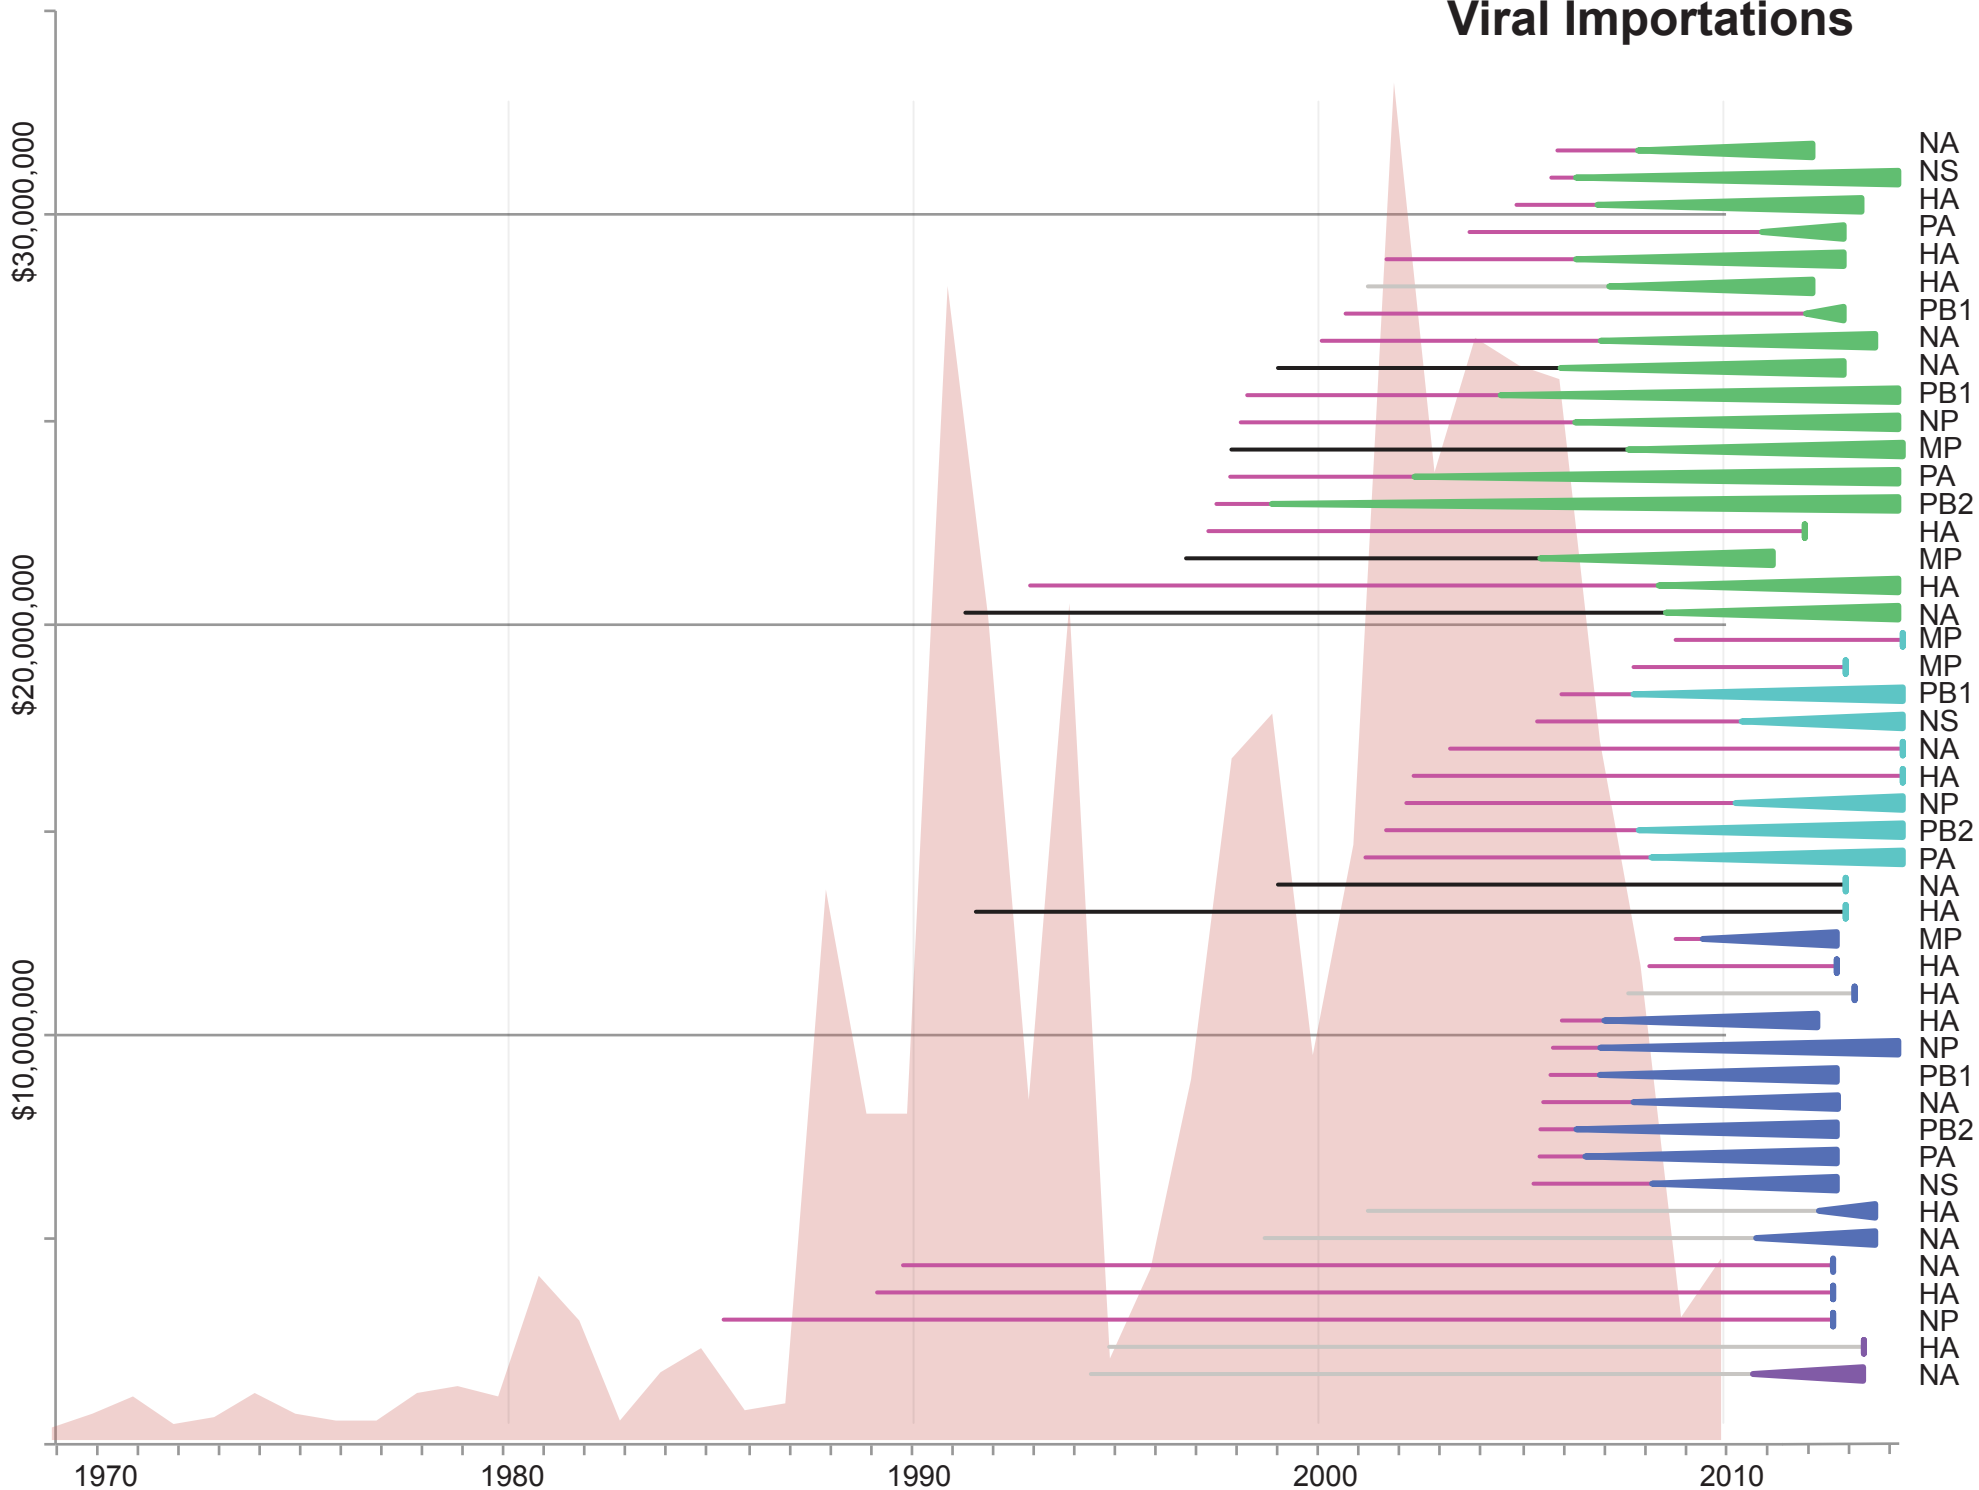

Supplement: supp [file elife-16777-supp-v1.zip]

(A) TRIG  
PB2-PB1-PA  
NP-NS

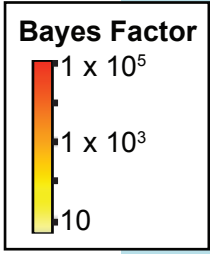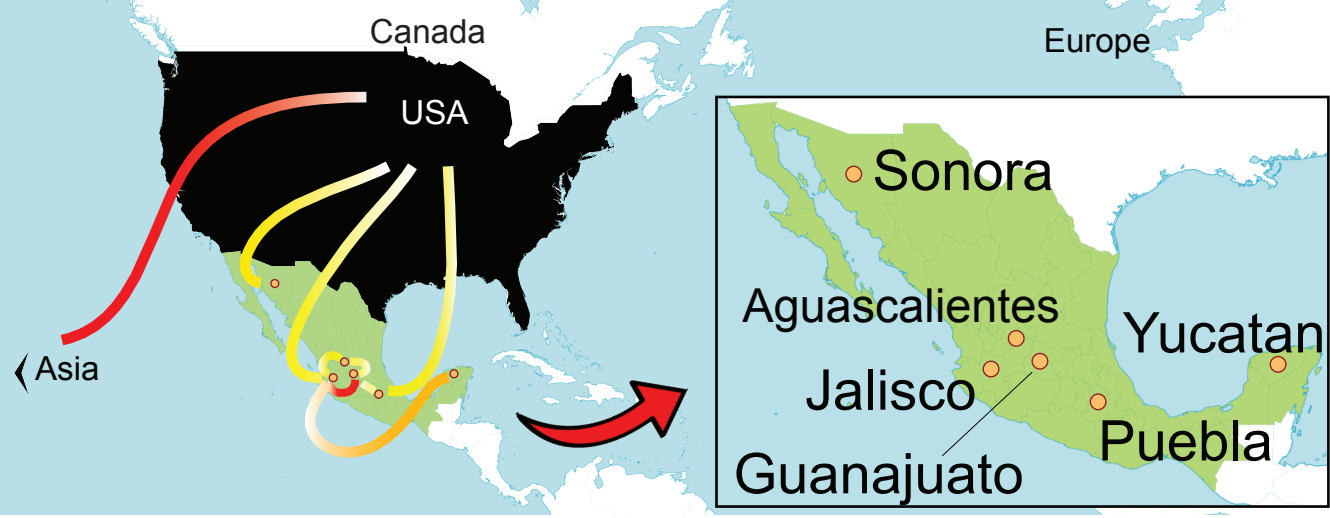

(B) Classical  
H1

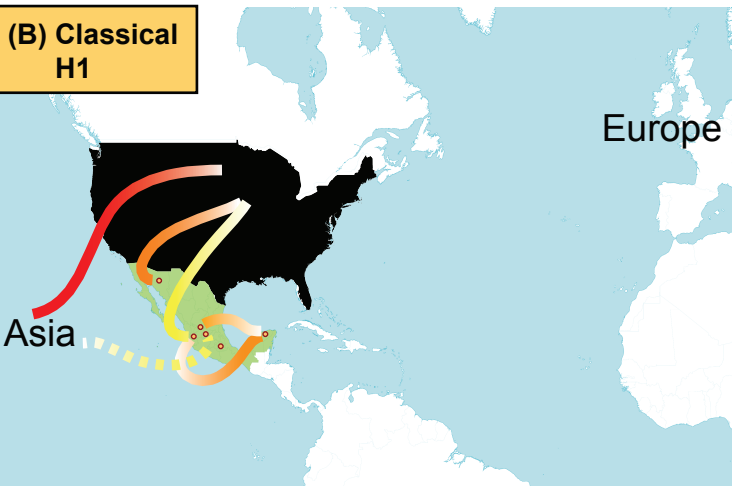

(C) Classical  
N1

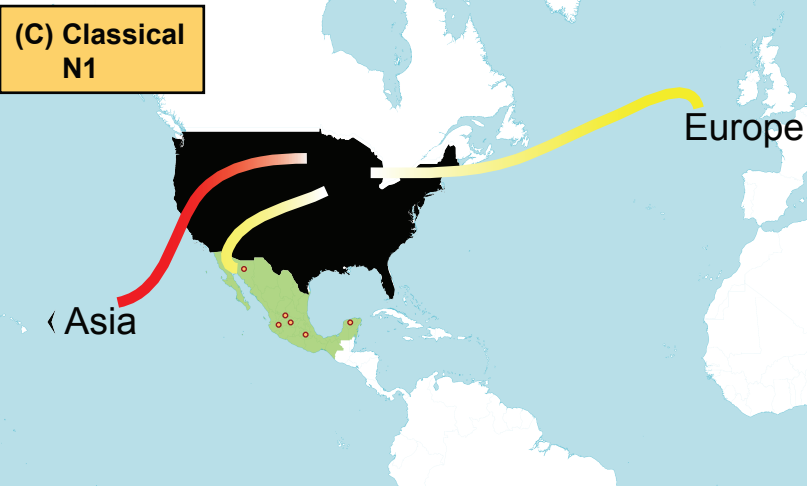

(D) H3

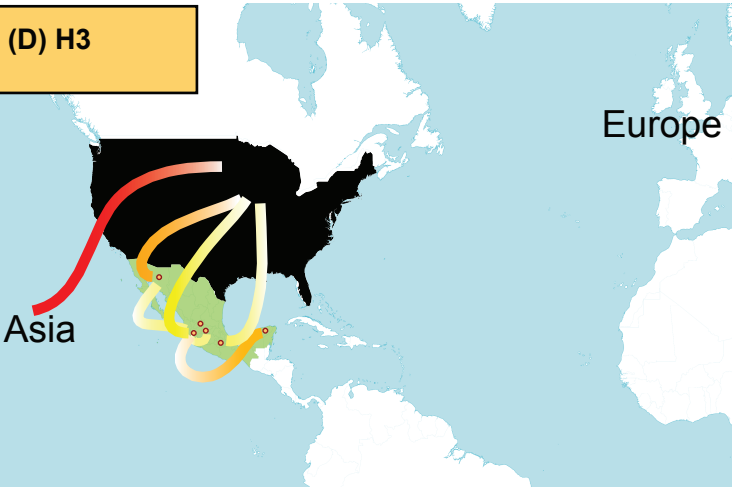

(E) N2

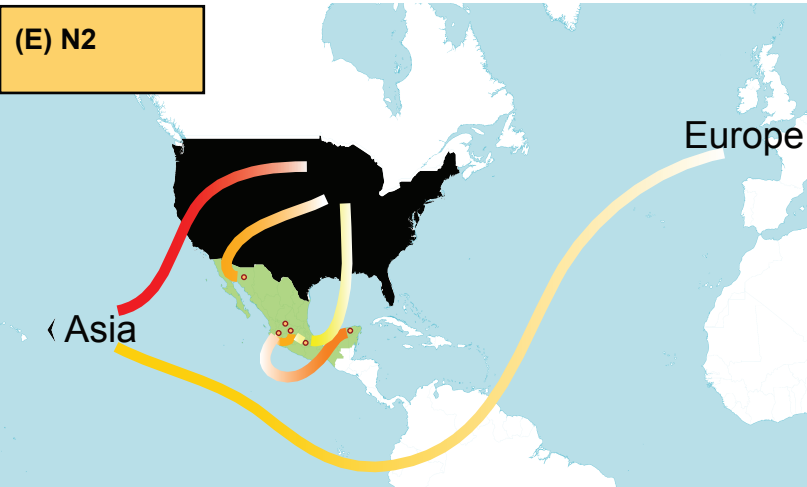

(F) Eurasian  
N1

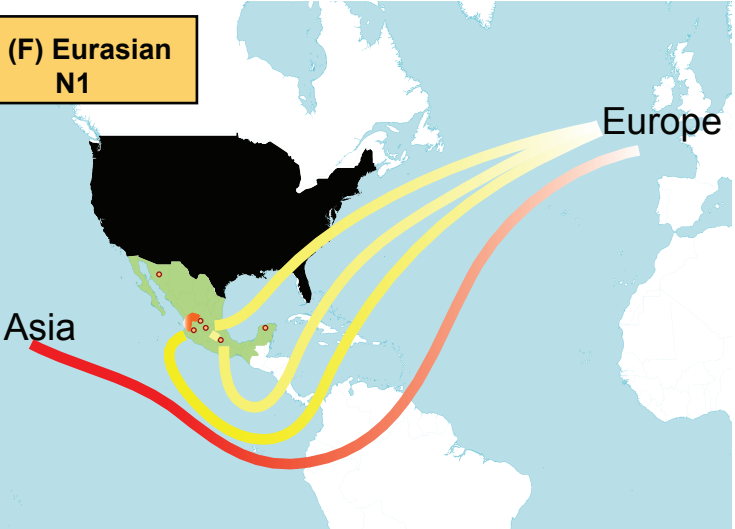

(G) Eurasian  
MP

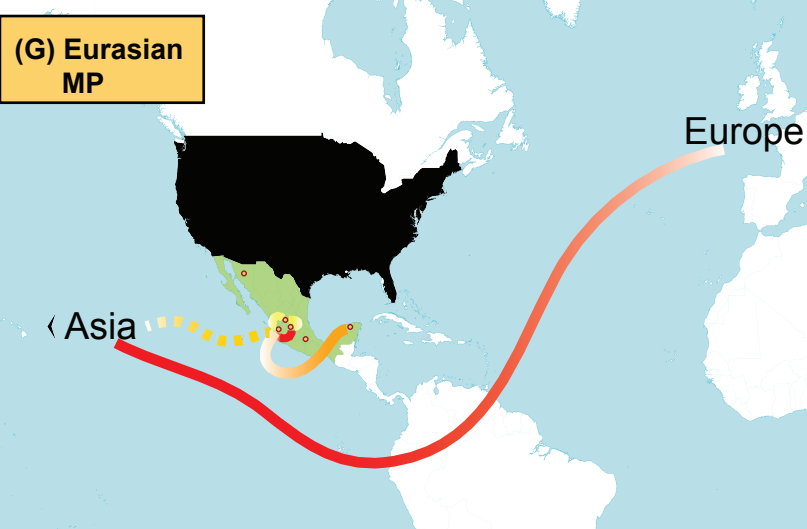

Supplement: supp [file elife-16777-supp-v1.zip]
